# Supplementary material for: 4,6-Bis(supermesitylphosphanylidenemethyl)dibenzofuran. Synthesis, X-ray structure and reactivity towards group 11 metals
Source: Royal Society of Chemistry journal article supplement (doi:10.1039/b508678g), 2005-10-28
Supplement: b508678g.pdf [file b508678g.pdf]

## **4,6-Bis-Supermesitylphosphanylidene-methyl-Dibenzofurane.**

### **Synthesis, X-ray Structure and Reactivity towards Group 11 metals.**

**Eliane Deschamps, Bernard Deschamps, Jeanne Laure Dormieux, Louis Ricard,**

**Nicolas Mézailles and Pascal Le Floch\***

#### **X-Ray structural data for 3**

|                                                                                             |         |
|---------------------------------------------------------------------------------------------|---------|
| Table 1: Crystal data for <b>3</b>                                                          | 1 page  |
| Table 2: Atomic coordinates and equivalent isotropic displacement parameters for <b>3</b>   | 1 page  |
| Table 3: Bond lengths and bond angles for <b>3</b>                                          | 2 pages |
| Table 4: Anisotropic displacement parameters for <b>3</b>                                   | 1 page  |
| Table 5: Hydrogen coordinates and equivalent isotropic displacement parameters for <b>3</b> | 1 page  |

#### **X-Ray structural data for 4**

|                                                                                              |         |
|----------------------------------------------------------------------------------------------|---------|
| Table 6: Crystal data for <b>4</b>                                                           | 1 page  |
| Table 7: Atomic coordinates and equivalent isotropic displacement parameters for <b>4</b>    | 2 pages |
| Table 8: Bond lengths and bond angles for <b>4</b>                                           | 2 pages |
| Table 9: Anisotropic displacement parameters for <b>4</b>                                    | 2 pages |
| Table 10: Hydrogen coordinates and equivalent isotropic displacement parameters for <b>4</b> | 2 pages |

#### **X-Ray structural data for 5**

|                                                                                              |         |
|----------------------------------------------------------------------------------------------|---------|
| Table 11: Crystal data for <b>5</b>                                                          | 1 page  |
| Table 12: Atomic coordinates and equivalent isotropic displacement parameters for <b>5</b>   | 1 page  |
| Table 13: Bond lengths and bond angles for <b>5</b>                                          | 2 pages |
| Table 14: Anisotropic displacement parameters for <b>5</b>                                   | 1 page  |
| Table 15: Hydrogen coordinates and equivalent isotropic displacement parameters for <b>5</b> | 2 pages |

#### **X-Ray structural data for 6**

|                                                                                              |         |
|----------------------------------------------------------------------------------------------|---------|
| Table 16: Crystal data for <b>6</b>                                                          | 1 page  |
| Table 17: Atomic coordinates and equivalent isotropic displacement parameters for <b>6</b>   | 2 pages |
| Table 18: Bond lengths and bond angles for <b>6</b>                                          | 2 pages |
| Table 19: Anisotropic displacement parameters for <b>6</b>                                   | 2 pages |
| Table 20: Hydrogen coordinates and equivalent isotropic displacement parameters for <b>6</b> | 2 pages |

**Data for the theoretical structure I.**

|                                 |         |
|---------------------------------|---------|
| View of the optimized structure | 1 page  |
| Standard orientation:           | 2 pages |

**Data for the theoretical structure II.**

|                                 |         |
|---------------------------------|---------|
| View of the optimized structure | 1 page  |
| Standard orientation:           | 2 pages |

### X-Ray structural data for **3**.

Table 1. Crystal data for **3**

|                                             |                                                 |
|---------------------------------------------|-------------------------------------------------|
| Compound                                    | <b>3</b>                                        |
| Molecular formula                           | C <sub>50</sub> H <sub>66</sub> OP <sub>2</sub> |
| Molecular weight                            | 744.97                                          |
| Crystal habit                               | pale yellow plate                               |
| Crystal dimensions(mm)                      | 0.20x0.18x0.12                                  |
| Crystal system                              | monoclinic                                      |
| Space group                                 | C2/c                                            |
| a(Å)                                        | 15.9660(10)                                     |
| b(Å)                                        | 10.4070(10)                                     |
| c(Å)                                        | 14.0990(10)                                     |
| α(°)                                        | 90.00                                           |
| β(°)                                        | 105.2600(10)                                    |
| γ(°)                                        | 90.00                                           |
| V(Å <sup>3</sup> )                          | 2260.1(3)                                       |
| Z                                           | 2                                               |
| d(g-cm <sup>-3</sup> )                      | 1.095                                           |
| F(000)                                      | 808                                             |
| μ(cm <sup>-1</sup> )                        | 0.130                                           |
| Absorption corrections                      | multi-scan ; 0.9745 min, 0.9846 max             |
| Diffractometer                              | KappaCCD                                        |
| X-ray source                                | MoKα                                            |
| λ(Å)                                        | 0.71069                                         |
| Monochromator                               | graphite                                        |
| T (K)                                       | 150.0(1)                                        |
| Scan mode                                   | phi and omega scans                             |
| Maximum θ                                   | 30.03                                           |
| HKL ranges                                  | -15 22 ; -14 13 ; -19 19                        |
| Reflections measured                        | 7551                                            |
| Unique data                                 | 5849                                            |
| Rint                                        | 0.0193                                          |
| Reflections used                            | 5376                                            |
| Criterion                                   | I > 2σ(I)                                       |
| Refinement type                             | Fsqd                                            |
| Hydrogen atoms                              | mixed                                           |
| Parameters refined                          | 249                                             |
| Reflections / parameter                     | 21                                              |
| wR2                                         | 0.0924                                          |
| R1                                          | 0.0349                                          |
| Flack's parameter                           | 0.26(6)                                         |
| Weights a, b                                | 0.0488 ; 0.1741                                 |
| GoF                                         | 1.056                                           |
| difference peak / hole (e Å <sup>-3</sup> ) | 0.197(0.036) / -0.209(0.036)                    |

## Electronic Supplementary Information for Dalton Transactions

This journal is © The Royal Society of Chemistry 2005

Table 2. Atomic Coordinates ( $\text{\AA} \times 10^4$ ) and equivalent isotropic displacement parameters ( $\text{\AA}^2 \times 10^3$ ) for **3**

| atom  | x        | y        | z        | U(eq) |
|-------|----------|----------|----------|-------|
| P(1)  | -4038(1) | 2162(1)  | -3818(1) | 26(1) |
| O(2)  | -5000    | -124(1)  | -5000    | 23(1) |
| C(3)  | -3513(1) | 3348(1)  | -2868(1) | 23(1) |
| C(4)  | -2628(1) | 3708(1)  | -2726(1) | 24(1) |
| C(5)  | -4436(1) | -923(1)  | -4354(1) | 23(1) |
| C(6)  | -2219(1) | 4357(1)  | -1861(1) | 27(1) |
| C(7)  | -3980(1) | 3817(1)  | -2208(1) | 25(1) |
| C(8)  | -4623(1) | -2219(1) | -4581(1) | 26(1) |
| C(9)  | -3765(1) | -505(1)  | -3554(1) | 26(1) |
| C(10) | -2643(1) | 4730(1)  | -1165(1) | 26(1) |
| C(11) | -2093(1) | 3486(2)  | -3484(1) | 30(1) |
| C(12) | -3528(1) | 4487(1)  | -1374(1) | 27(1) |
| C(13) | -3589(1) | 822(1)   | -3246(1) | 27(1) |
| C(14) | -4979(1) | 3663(2)  | -2373(1) | 32(1) |
| C(15) | -2149(1) | 5451(2)  | -235(1)  | 33(1) |
| C(16) | -3426(1) | -2790(2) | -3243(1) | 35(1) |
| C(17) | -2744(1) | 5861(2)  | 408(1)   | 45(1) |
| C(18) | -4106(1) | -3168(1) | -4027(1) | 32(1) |
| C(19) | -5468(1) | 4133(2)  | -3394(1) | 41(1) |
| C(20) | -2638(1) | 3647(2)  | -4545(1) | 49(1) |
| C(21) | -3270(1) | -1502(2) | -3013(1) | 34(1) |
| C(22) | -1428(1) | 4597(2)  | 374(1)   | 49(1) |
| C(23) | -1662(1) | 2168(2)  | -3364(1) | 53(1) |
| C(24) | -5316(1) | 4472(2)  | -1643(1) | 45(1) |
| C(25) | -1750(1) | 6677(2)  | -534(1)  | 46(1) |
| C(26) | -5228(1) | 2268(2)  | -2222(1) | 47(1) |
| C(27) | -1368(1) | 4492(2)  | -3353(1) | 56(1) |

U(eq) is defined as 1/3 the trace of the  $U_{ij}$  tensor.

Electronic Supplementary Information for Dalton Transactions  
 This journal is © The Royal Society of Chemistry 2005

Table 3. Bond lengths (Å) and angles (deg) for **3**

|                     |          |                     |           |
|---------------------|----------|---------------------|-----------|
| P(1)-C(13)          | 1.674(2) | P(1)-C(3)           | 1.852(1)  |
| O(2)-C(5)           | 1.379(1) | O(2)-C(5)#2         | 1.379(1)  |
| C(3)-C(4)           | 1.423(2) | C(3)-C(7)           | 1.424(2)  |
| C(4)-C(6)           | 1.397(2) | C(4)-C(11)          | 1.551(2)  |
| C(5)-C(8)           | 1.399(2) | C(5)-C(9)           | 1.405(2)  |
| C(6)-C(10)          | 1.387(2) | C(6)-H(6)           | 0.9500    |
| C(7)-C(12)          | 1.394(2) | C(7)-C(14)          | 1.559(2)  |
| C(8)-C(18)          | 1.388(2) | C(8)-C(8)#2         | 1.449(3)  |
| C(9)-C(21)          | 1.401(2) | C(9)-C(13)          | 1.454(2)  |
| C(10)-C(12)         | 1.389(2) | C(10)-C(15)         | 1.536(2)  |
| C(11)-C(23)         | 1.524(2) | C(11)-C(20)         | 1.528(2)  |
| C(11)-C(27)         | 1.535(2) | C(12)-H(12)         | 0.9500    |
| C(13)-H(13)         | 0.9500   | C(14)-C(19)         | 1.526(2)  |
| C(14)-C(24)         | 1.533(2) | C(14)-C(26)         | 1.534(2)  |
| C(15)-C(22)         | 1.526(2) | C(15)-C(25)         | 1.534(2)  |
| C(15)-C(17)         | 1.536(2) | C(16)-C(21)         | 1.386(2)  |
| C(16)-C(18)         | 1.387(2) | C(16)-H(16)         | 0.9500    |
| C(17)-H(17A)        | 0.9800   | C(17)-H(17B)        | 0.9800    |
| C(17)-H(17C)        | 0.9800   | C(18)-H(18)         | 0.9500    |
| C(19)-H(19A)        | 0.9800   | C(19)-H(19B)        | 0.9800    |
| C(19)-H(19C)        | 0.9800   | C(20)-H(20A)        | 0.9800    |
| C(20)-H(20B)        | 0.9800   | C(20)-H(20C)        | 0.9800    |
| C(21)-H(21)         | 0.9500   | C(22)-H(22A)        | 0.9800    |
| C(22)-H(22B)        | 0.9800   | C(22)-H(22C)        | 0.9800    |
| C(23)-H(23A)        | 0.9800   | C(23)-H(23B)        | 0.9800    |
| C(23)-H(23C)        | 0.9800   | C(24)-H(24A)        | 0.9800    |
| C(24)-H(24B)        | 0.9800   | C(24)-H(24C)        | 0.9800    |
| C(25)-H(25A)        | 0.9800   | C(25)-H(25B)        | 0.9800    |
| C(25)-H(25C)        | 0.9800   | C(26)-H(26A)        | 0.9800    |
| C(26)-H(26B)        | 0.9800   | C(26)-H(26C)        | 0.9800    |
| C(27)-H(27A)        | 0.9800   | C(27)-H(27B)        | 0.9800    |
| C(27)-H(27C)        | 0.9800   |                     |           |
| C(13)-P(1)-C(3)     | 98.72(7) | C(5)-O(2)-C(5)#2    | 105.8(1)  |
| C(4)-C(3)-C(7)      | 119.3(1) | C(4)-C(3)-P(1)      | 121.4(1)  |
| C(7)-C(3)-P(1)      | 119.1(1) | C(6)-C(4)-C(3)      | 118.0(1)  |
| C(6)-C(4)-C(11)     | 117.2(1) | C(3)-C(4)-C(11)     | 124.8(1)  |
| O(2)-C(5)-C(8)      | 111.5(1) | O(2)-C(5)-C(9)      | 124.8(1)  |
| C(8)-C(5)-C(9)      | 123.6(1) | C(10)-C(6)-C(4)     | 123.4(1)  |
| C(10)-C(6)-H(6)     | 118.3    | C(4)-C(6)-H(6)      | 118.3     |
| C(12)-C(7)-C(3)     | 118.6(1) | C(12)-C(7)-C(14)    | 117.4(1)  |
| C(3)-C(7)-C(14)     | 124.0(1) | C(18)-C(8)-C(5)     | 119.8(1)  |
| C(18)-C(8)-C(8)#2   | 134.6(1) | C(5)-C(8)-C(8)#2    | 105.55(8) |
| C(21)-C(9)-C(5)     | 114.2(1) | C(21)-C(9)-C(13)    | 120.2(1)  |
| C(5)-C(9)-C(13)     | 125.5(1) | C(6)-C(10)-C(12)    | 117.2(1)  |
| C(6)-C(10)-C(15)    | 120.3(1) | C(12)-C(10)-C(15)   | 122.3(1)  |
| C(23)-C(11)-C(20)   | 109.4(1) | C(23)-C(11)-C(27)   | 107.2(1)  |
| C(20)-C(11)-C(27)   | 105.1(1) | C(23)-C(11)-C(4)    | 111.9(1)  |
| C(20)-C(11)-C(4)    | 112.5(1) | C(27)-C(11)-C(4)    | 110.4(1)  |
| C(10)-C(12)-C(7)    | 122.8(1) | C(10)-C(12)-H(12)   | 118.6     |
| C(7)-C(12)-H(12)    | 118.6    | C(9)-C(13)-P(1)     | 128.5(1)  |
| C(9)-C(13)-H(13)    | 115.7    | P(1)-C(13)-H(13)    | 115.7     |
| C(19)-C(14)-C(24)   | 105.9(1) | C(19)-C(14)-C(26)   | 110.3(1)  |
| C(24)-C(14)-C(26)   | 106.1(1) | C(19)-C(14)-C(7)    | 110.9(1)  |
| C(24)-C(14)-C(7)    | 111.7(1) | C(26)-C(14)-C(7)    | 111.6(1)  |
| C(22)-C(15)-C(25)   | 109.4(1) | C(22)-C(15)-C(17)   | 108.8(1)  |
| C(25)-C(15)-C(17)   | 107.3(1) | C(22)-C(15)-C(10)   | 109.7(1)  |
| C(25)-C(15)-C(10)   | 109.1(1) | C(17)-C(15)-C(10)   | 112.4(1)  |
| C(21)-C(16)-C(18)   | 121.0(1) | C(21)-C(16)-H(16)   | 119.5     |
| C(18)-C(16)-H(16)   | 119.5    | C(15)-C(17)-H(17A)  | 109.5     |
| C(15)-C(17)-H(17B)  | 109.5    | H(17A)-C(17)-H(17B) | 109.5     |
| C(15)-C(17)-H(17C)  | 109.5    | H(17A)-C(17)-H(17C) | 109.5     |
| H(17B)-C(17)-H(17C) | 109.5    | C(16)-C(18)-C(8)    | 118.1(1)  |
| C(16)-C(18)-H(18)   | 120.9    | C(8)-C(18)-H(18)    | 120.9     |
| C(14)-C(19)-H(19A)  | 109.5    | C(14)-C(19)-H(19B)  | 109.5     |
| H(19A)-C(19)-H(19C) | 109.5    | C(14)-C(19)-H(19C)  | 109.5     |
| H(19A)-C(19)-H(19C) | 109.5    | H(19B)-C(19)-H(19C) | 109.5     |
| C(11)-C(20)-H(20A)  | 109.5    | C(11)-C(20)-H(20B)  | 109.5     |

Electronic Supplementary Information for Dalton Transactions

This journal is © The Royal Society of Chemistry 2005

|                     |          |                     |       |
|---------------------|----------|---------------------|-------|
| H(20A)-C(20)-H(20B) | 109.5    | C(11)-C(20)-H(20C)  | 109.5 |
| H(20A)-C(20)-H(20C) | 109.5    | H(20B)-C(20)-H(20C) | 109.5 |
| C(16)-C(21)-C(9)    | 123.2(1) | C(16)-C(21)-H(21)   | 118.4 |
| C(9)-C(21)-H(21)    | 118.4    | C(15)-C(22)-H(22A)  | 109.5 |
| C(15)-C(22)-H(22B)  | 109.5    | H(22A)-C(22)-H(22B) | 109.5 |
| C(15)-C(22)-H(22C)  | 109.5    | H(22A)-C(22)-H(22C) | 109.5 |
| H(22B)-C(22)-H(22C) | 109.5    | C(11)-C(23)-H(23A)  | 109.5 |
| C(11)-C(23)-H(23B)  | 109.5    | H(23A)-C(23)-H(23B) | 109.5 |
| C(11)-C(23)-H(23C)  | 109.5    | H(23A)-C(23)-H(23C) | 109.5 |
| H(23B)-C(23)-H(23C) | 109.5    | C(14)-C(24)-H(24A)  | 109.5 |
| C(14)-C(24)-H(24B)  | 109.5    | H(24A)-C(24)-H(24B) | 109.5 |
| C(14)-C(24)-H(24C)  | 109.5    | H(24A)-C(24)-H(24C) | 109.5 |
| H(24B)-C(24)-H(24C) | 109.5    | C(15)-C(25)-H(25A)  | 109.5 |
| C(15)-C(25)-H(25B)  | 109.5    | H(25A)-C(25)-H(25B) | 109.5 |
| C(15)-C(25)-H(25C)  | 109.5    | H(25A)-C(25)-H(25C) | 109.5 |
| H(25B)-C(25)-H(25C) | 109.5    | C(14)-C(26)-H(26A)  | 109.5 |
| C(14)-C(26)-H(26B)  | 109.5    | H(26A)-C(26)-H(26B) | 109.5 |
| C(14)-C(26)-H(26C)  | 109.5    | H(26A)-C(26)-H(26C) | 109.5 |
| H(26B)-C(26)-H(26C) | 109.5    | C(11)-C(27)-H(27A)  | 109.5 |
| C(11)-C(27)-H(27B)  | 109.5    | H(27A)-C(27)-H(27B) | 109.5 |
| C(11)-C(27)-H(27C)  | 109.5    | H(27A)-C(27)-H(27C) | 109.5 |
| H(27B)-C(27)-H(27C) | 109.5    |                     |       |

-----  
 Estimated standard deviations are given in the parenthesis.

Symmetry operators ::

1: x, y, z

2: -x, y, -z

3: x+1/2, y+1/2, z

4: -x+1/2, y+1/2, -z

Table 4. Anisotropic displacement parameters ( $\text{\AA}^2 \times 10^3$ ) for **3**

| atom  | U11   | U22   | U33   | U23    | U13   | U12    |
|-------|-------|-------|-------|--------|-------|--------|
| P(1)  | 29(1) | 22(1) | 26(1) | -2(1)  | 3(1)  | -1(1)  |
| O(2)  | 29(1) | 18(1) | 21(1) | 0      | 6(1)  | 0      |
| C(3)  | 26(1) | 20(1) | 23(1) | 0(1)   | 4(1)  | 0(1)   |
| C(4)  | 25(1) | 22(1) | 26(1) | 1(1)   | 6(1)  | 1(1)   |
| C(5)  | 28(1) | 19(1) | 24(1) | 3(1)   | 10(1) | 3(1)   |
| C(6)  | 24(1) | 28(1) | 27(1) | 0(1)   | 4(1)  | -4(1)  |
| C(7)  | 27(1) | 22(1) | 24(1) | 2(1)   | 7(1)  | -1(1)  |
| C(8)  | 33(1) | 21(1) | 26(1) | 0(1)   | 13(1) | 2(1)   |
| C(9)  | 31(1) | 24(1) | 24(1) | 1(1)   | 8(1)  | 2(1)   |
| C(10) | 33(1) | 22(1) | 21(1) | 0(1)   | 4(1)  | -2(1)  |
| C(11) | 30(1) | 33(1) | 31(1) | -4(1)  | 12(1) | 0(1)   |
| C(12) | 32(1) | 26(1) | 25(1) | 0(1)   | 10(1) | 0(1)   |
| C(13) | 30(1) | 28(1) | 22(1) | -2(1)  | 4(1)  | -2(1)  |
| C(14) | 27(1) | 36(1) | 34(1) | 0(1)   | 10(1) | -1(1)  |
| C(15) | 42(1) | 31(1) | 23(1) | -1(1)  | 4(1)  | -8(1)  |
| C(16) | 46(1) | 25(1) | 32(1) | 8(1)   | 7(1)  | 10(1)  |
| C(17) | 59(1) | 51(1) | 27(1) | -12(1) | 12(1) | -10(1) |
| C(18) | 46(1) | 18(1) | 35(1) | 4(1)   | 16(1) | 5(1)   |
| C(19) | 30(1) | 55(1) | 37(1) | 2(1)   | 6(1)  | 8(1)   |
| C(20) | 45(1) | 75(1) | 31(1) | 5(1)   | 16(1) | 1(1)   |
| C(21) | 39(1) | 32(1) | 28(1) | 5(1)   | 5(1)  | 6(1)   |
| C(22) | 50(1) | 49(1) | 37(1) | -3(1)  | -7(1) | -5(1)  |
| C(23) | 54(1) | 48(1) | 67(1) | 3(1)   | 35(1) | 17(1)  |
| C(24) | 32(1) | 62(1) | 44(1) | -8(1)  | 16(1) | 3(1)   |
| C(25) | 69(1) | 35(1) | 34(1) | -8(1)  | 13(1) | -22(1) |
| C(26) | 37(1) | 41(1) | 69(1) | 4(1)   | 24(1) | -9(1)  |
| C(27) | 56(1) | 69(1) | 57(1) | -21(1) | 38(1) | -27(1) |

The anisotropic displacement factor exponent takes the form  
 $2 \pi^2 [h^2 a^2 U(11) + \dots + 2 h k a^* b^* U(12)]$

## Electronic Supplementary Information for Dalton Transactions

This journal is © The Royal Society of Chemistry 2005

Table 5. Hydrogen Coordinates ( $\text{\AA} \times 10^4$ ) and equivalent isotropic displacement parameters ( $\text{\AA}^2 \times 10^3$ ) for **3**

| atom   | x          | y     | z          | U(eq) |
|--------|------------|-------|------------|-------|
| H(6)   | -1619      | 4552  | -1744      | 32    |
| H(12)  | -3838      | 4791  | -929       | 32    |
| H(13)  | -3162      | 947   | -2640.9998 | 33    |
| H(16)  | -3061      | -3423 | -2858      | 42    |
| H(17A) | -2405      | 6338  | 980        | 68    |
| H(17B) | -2997      | 5096  | 630        | 68    |
| H(17C) | -3210      | 6409  | 24         | 68    |
| H(18)  | -4215      | -4051 | -4182      | 39    |
| H(19A) | -6093.9995 | 4054  | -3474      | 62    |
| H(19B) | -5301      | 3612  | -3894      | 62    |
| H(19C) | -5321      | 5035  | -3471      | 62    |
| H(20A) | -2257      | 3633  | -4988      | 74    |
| H(20B) | -2948.0002 | 4469  | -4612      | 74    |
| H(20C) | -3058      | 2943  | -4714      | 74    |
| H(21)  | -2805      | -1284 | -2461      | 40    |
| H(22A) | -1018      | 4387  | -11        | 73    |
| H(22B) | -1681      | 3804  | 550        | 73    |
| H(22C) | -1123      | 5053  | 974        | 73    |
| H(23A) | -1332      | 2048  | -2678      | 79    |
| H(23B) | -1267      | 2108  | -3790      | 79    |
| H(23C) | -2108      | 1500  | -3547      | 79    |
| H(24A) | -5129      | 5366  | -1668.0001 | 68    |
| H(24B) | -5083      | 4133  | -978       | 68    |
| H(24C) | -5952      | 4436  | -1817.9999 | 68    |
| H(25A) | -1471      | 7172  | 55         | 69    |
| H(25B) | -2208      | 7196  | -964       | 69    |
| H(25C) | -1318      | 6445  | -886       | 69    |
| H(26A) | -5856.9995 | 2208  | -2321      | 71    |
| H(26B) | -4933      | 1993  | -1553.0001 | 71    |
| H(26C) | -5052.0005 | 1712  | -2697      | 71    |
| H(27A) | -939       | 4353  | -2722      | 84    |
| H(27B) | -1617      | 5353  | -3365      | 84    |
| H(27C) | -1085      | 4410  | -3888      | 84    |



**X-Ray structural data for 4.**

Table 6. Crystal data for **4**

|                                             |                                                                                                     |
|---------------------------------------------|-----------------------------------------------------------------------------------------------------|
| Compound                                    | <b>4</b>                                                                                            |
| Molecular formula                           | C <sub>50</sub> H <sub>66</sub> AuOP <sub>2</sub> ,C <sub>4</sub> H <sub>10</sub> O,BF <sub>4</sub> |
| Molecular weight                            | 1102.86                                                                                             |
| Crystal habit                               | pale yellow block                                                                                   |
| Crystal dimensions(mm)                      | 0.20x0.18x0.16                                                                                      |
| Crystal system                              | orthorhombic                                                                                        |
| Space group                                 | P2 <sub>1</sub> 2 <sub>1</sub> 2 <sub>1</sub>                                                       |
| a(Å)                                        | 11.6470(10)                                                                                         |
| b(Å)                                        | 16.8950(10)                                                                                         |
| c(Å)                                        | 27.3290(10)                                                                                         |
| α(°)                                        | 90.00                                                                                               |
| β(°)                                        | 90.00                                                                                               |
| γ(°)                                        | 90.00                                                                                               |
| V(Å <sup>3</sup> )                          | 5377.7(6)                                                                                           |
| Z                                           | 4                                                                                                   |
| d(g·cm <sup>-3</sup> )                      | 1.362                                                                                               |
| F(000)                                      | 2264                                                                                                |
| μ(cm <sup>-1</sup> )                        | 2.846                                                                                               |
| Absorption corrections                      | multi-scan ; 0.5999 min, 0.6588 max                                                                 |
| Diffractionmeter                            | KappaCCD                                                                                            |
| X-ray source                                | MoKα                                                                                                |
| λ(Å)                                        | 0.71069                                                                                             |
| Monochromator                               | graphite                                                                                            |
| T (K)                                       | 150.0(1)                                                                                            |
| Scan mode                                   | phi and omega scans                                                                                 |
| Maximum θ                                   | 30.03                                                                                               |
| HKL ranges                                  | -16 16 ; -21 23 ; -38 38                                                                            |
| Reflections measured                        | 27925                                                                                               |
| Unique data                                 | 15461                                                                                               |
| Rint                                        | 0.0302                                                                                              |
| Reflections used                            | 13250                                                                                               |
| Criterion                                   | I > 2σ(I)                                                                                           |
| Refinement type                             | Fsqd                                                                                                |
| Hydrogen atoms                              | mixed                                                                                               |
| Parameters refined                          | 597                                                                                                 |
| Reflections / parameter                     | 22                                                                                                  |
| wR2                                         | 0.0701                                                                                              |
| R1                                          | 0.0340                                                                                              |
| Flack's parameter                           | -0.021(3)                                                                                           |
| Weights a, b                                | 0.0330 ; 0.0000                                                                                     |
| GoF                                         | 0.996                                                                                               |
| difference peak / hole (e Å <sup>-3</sup> ) | 1.488(0.096) / -1.468(0.096)                                                                        |

Electronic Supplementary Information for Dalton Transactions  
 This journal is © The Royal Society of Chemistry 2005

Table 7. Atomic Coordinates ( $\text{Å} \times 10^4$ ) and equivalent isotropic displacement parameters ( $\text{Å}^2 \times 10^3$ ) for **4**

| atom  | x        | y        | z       | U(eq)  |
|-------|----------|----------|---------|--------|
| Au(1) | 144(1)   | 8625(1)  | 3998(1) | 30(1)  |
| P(1)  | -763(1)  | 7460(1)  | 4141(1) | 28(1)  |
| P(2)  | 690(1)   | 9860(1)  | 3773(1) | 29(1)  |
| O(1)  | -1713(2) | 8921(1)  | 3437(1) | 29(1)  |
| C(1)  | -1987(3) | 7223(2)  | 3859(1) | 31(1)  |
| C(2)  | -2683(3) | 7623(2)  | 3496(1) | 27(1)  |
| C(3)  | -3612(3) | 7199(2)  | 3299(1) | 34(1)  |
| C(4)  | -4337(3) | 7514(2)  | 2943(1) | 36(1)  |
| C(5)  | -4185(3) | 8266(2)  | 2762(1) | 34(1)  |
| C(6)  | -3278(2) | 8709(2)  | 2948(1) | 28(1)  |
| C(7)  | -2558(2) | 8388(2)  | 3304(1) | 27(1)  |
| C(8)  | -1910(3) | 9606(2)  | 3164(1) | 28(1)  |
| C(9)  | -2867(3) | 9507(2)  | 2862(1) | 30(1)  |
| C(10) | -3225(3) | 10129(2) | 2568(1) | 34(1)  |
| C(11) | -2639(3) | 10843(2) | 2602(1) | 36(1)  |
| C(12) | -1691(3) | 10922(2) | 2900(1) | 36(1)  |
| C(13) | -1254(3) | 10291(2) | 3190(1) | 30(1)  |
| C(14) | -186(3)  | 10427(2) | 3444(1) | 31(1)  |
| C(15) | -258(3)  | 6679(2)  | 4536(1) | 27(1)  |
| C(16) | 366(3)   | 6030(2)  | 4328(1) | 30(1)  |
| C(17) | 761(3)   | 5451(2)  | 4650(1) | 32(1)  |
| C(18) | 612(3)   | 5488(2)  | 5153(1) | 31(1)  |
| C(19) | 45(2)    | 6131(2)  | 5340(1) | 30(1)  |
| C(20) | -398(2)  | 6742(2)  | 5055(1) | 29(1)  |
| C(21) | 624(3)   | 5892(2)  | 3778(1) | 40(1)  |
| C(22) | 1055(4)  | 6633(3)  | 3507(2) | 64(1)  |
| C(23) | 1596(5)  | 5282(3)  | 3711(2) | 73(2)  |
| C(24) | -424(4)  | 5562(3)  | 3525(2) | 77(2)  |
| C(25) | 1130(3)  | 4831(2)  | 5477(1) | 37(1)  |
| C(26) | 2434(3)  | 4950(3)  | 5482(2) | 60(1)  |
| C(27) | 852(4)   | 4017(3)  | 5271(2) | 56(1)  |
| C(28) | 678(3)   | 4866(3)  | 6002(1) | 52(1)  |
| C(29) | -976(3)  | 7446(2)  | 5327(1) | 34(1)  |
| C(30) | -1158(4) | 7263(3)  | 5875(1) | 52(1)  |
| C(31) | -2176(3) | 7645(3)  | 5129(2) | 49(1)  |
| C(32) | -191(4)  | 8168(2)  | 5309(1) | 52(1)  |
| C(33) | 1943(3)  | 10468(2) | 3877(1) | 26(1)  |
| C(34) | 2097(3)  | 10856(2) | 4336(1) | 27(1)  |
| C(35) | 2712(3)  | 11564(2) | 4331(1) | 34(1)  |
| C(36) | 3165(3)  | 11891(2) | 3903(1) | 36(1)  |
| C(37) | 3126(3)  | 11429(2) | 3484(1) | 35(1)  |
| C(38) | 2563(3)  | 10709(2) | 3459(1) | 29(1)  |
| C(39) | 1663(3)  | 10518(2) | 4827(1) | 31(1)  |
| C(40) | 2096(3)  | 9678(2)  | 4897(1) | 38(1)  |
| C(41) | 343(3)   | 10533(2) | 4864(1) | 43(1)  |
| C(42) | 2115(4)  | 10999(3) | 5267(1) | 48(1)  |
| C(43) | 3686(4)  | 12722(2) | 3882(1) | 49(1)  |
| C(44) | 3660(7)  | 13127(3) | 4373(2) | 121(3) |
| C(45) | 3002(4)  | 13225(2) | 3521(2) | 50(1)  |
| C(46) | 4940(4)  | 12660(3) | 3692(2) | 79(2)  |
| C(47) | 2720(3)  | 10223(2) | 2981(1) | 36(1)  |
| C(48) | 1967(4)  | 10544(3) | 2568(1) | 63(1)  |
| C(49) | 3976(3)  | 10295(3) | 2815(2) | 58(1)  |
| C(50) | 2489(5)  | 9342(3)  | 3036(2) | 70(2)  |
| C(51) | -267(6)  | 7963(4)  | 2460(2) | 102(2) |
| C(52) | 356(8)   | 8253(4)  | 2045(2) | 128(3) |
| O(2)  | 434(3)   | 7700(2)  | 1677(1) | 76(1)  |
| C(53) | 1030(10) | 7923(4)  | 1256(2) | 166(5) |
| C(54) | 970(10)  | 7360(4)  | 880(2)  | 173(5) |
| B(1)  | 4780(5)  | 10189(3) | 1390(2) | 53(1)  |
| F(1)  | 3757(2)  | 10462(2) | 1205(1) | 75(1)  |
| F(2)  | 5313(2)  | 10795(1) | 1652(1) | 61(1)  |
| F(3)  | 5489(3)  | 9968(2)  | 1003(1) | 76(1)  |

F(4)      4653(3)      9552(2)      1693(1)      86(1)

---

$U(\text{eq})$  is defined as  $1/3$  the trace of the  $U_{ij}$  tensor.

Table 8. Bond lengths (Å) and angles (deg) for **4**

|                   |           |                   |          |
|-------------------|-----------|-------------------|----------|
| Au(1)-P(1)        | 2.267(1)  | Au(1)-P(2)        | 2.267(1) |
| P(1)-C(1)         | 1.669(3)  | P(1)-C(15)        | 1.804(3) |
| P(2)-C(14)        | 1.663(3)  | P(2)-C(33)        | 1.807(3) |
| O(1)-C(7)         | 1.383(4)  | O(1)-C(8)         | 1.396(4) |
| C(1)-C(2)         | 1.449(4)  | C(2)-C(7)         | 1.403(5) |
| C(2)-C(3)         | 1.405(4)  | C(3)-C(4)         | 1.394(5) |
| C(4)-C(5)         | 1.375(5)  | C(5)-C(6)         | 1.390(4) |
| C(6)-C(7)         | 1.395(4)  | C(6)-C(9)         | 1.451(5) |
| C(8)-C(13)        | 1.388(5)  | C(8)-C(9)         | 1.397(4) |
| C(9)-C(10)        | 1.386(5)  | C(10)-C(11)       | 1.388(5) |
| C(11)-C(12)       | 1.379(5)  | C(12)-C(13)       | 1.421(5) |
| C(13)-C(14)       | 1.443(4)  | C(15)-C(20)       | 1.431(4) |
| C(15)-C(16)       | 1.433(5)  | C(16)-C(17)       | 1.393(4) |
| C(16)-C(21)       | 1.550(4)  | C(17)-C(18)       | 1.388(4) |
| C(18)-C(19)       | 1.371(5)  | C(18)-C(25)       | 1.542(5) |
| C(19)-C(20)       | 1.394(4)  | C(20)-C(29)       | 1.555(5) |
| C(21)-C(24)       | 1.510(6)  | C(21)-C(22)       | 1.540(6) |
| C(21)-C(23)       | 1.543(5)  | C(25)-C(27)       | 1.522(6) |
| C(25)-C(28)       | 1.530(5)  | C(25)-C(26)       | 1.532(5) |
| C(29)-C(32)       | 1.525(5)  | C(29)-C(31)       | 1.536(5) |
| C(29)-C(30)       | 1.545(5)  | C(33)-C(38)       | 1.410(4) |
| C(33)-C(34)       | 1.427(4)  | C(34)-C(35)       | 1.394(5) |
| C(34)-C(39)       | 1.545(4)  | C(35)-C(36)       | 1.397(4) |
| C(36)-C(37)       | 1.389(5)  | C(36)-C(43)       | 1.530(5) |
| C(37)-C(38)       | 1.382(5)  | C(38)-C(47)       | 1.554(5) |
| C(39)-C(40)       | 1.518(5)  | C(39)-C(41)       | 1.540(5) |
| C(39)-C(42)       | 1.544(5)  | C(43)-C(44)       | 1.508(6) |
| C(43)-C(45)       | 1.527(6)  | C(43)-C(46)       | 1.553(6) |
| C(47)-C(50)       | 1.519(6)  | C(47)-C(48)       | 1.529(5) |
| C(47)-C(49)       | 1.536(5)  | C(51)-C(52)       | 1.433(8) |
| C(52)-O(2)        | 1.376(6)  | O(2)-C(53)        | 1.396(7) |
| C(53)-C(54)       | 1.404(8)  | B(1)-F(4)         | 1.366(5) |
| B(1)-F(1)         | 1.374(5)  | B(1)-F(3)         | 1.393(5) |
| B(1)-F(2)         | 1.395(5)  |                   |          |
|                   |           |                   |          |
| P(1)-Au(1)-P(2)   | 167.56(3) | C(1)-P(1)-C(15)   | 112.3(2) |
| C(1)-P(1)-Au(1)   | 121.8(1)  | C(15)-P(1)-Au(1)  | 125.9(1) |
| C(14)-P(2)-C(33)  | 104.7(2)  | C(14)-P(2)-Au(1)  | 120.3(1) |
| C(33)-P(2)-Au(1)  | 135.1(1)  | C(7)-O(1)-C(8)    | 106.4(2) |
| C(2)-C(1)-P(1)    | 133.0(3)  | C(7)-C(2)-C(3)    | 114.0(3) |
| C(7)-C(2)-C(1)    | 128.9(3)  | C(3)-C(2)-C(1)    | 117.1(3) |
| C(4)-C(3)-C(2)    | 122.6(3)  | C(5)-C(4)-C(3)    | 121.7(3) |
| C(4)-C(5)-C(6)    | 117.7(3)  | C(5)-C(6)-C(7)    | 120.1(3) |
| C(5)-C(6)-C(9)    | 133.8(3)  | C(7)-C(6)-C(9)    | 106.0(3) |
| O(1)-C(7)-C(6)    | 111.0(3)  | O(1)-C(7)-C(2)    | 125.2(3) |
| C(6)-C(7)-C(2)    | 123.8(3)  | C(13)-C(8)-O(1)   | 125.0(3) |
| C(13)-C(8)-C(9)   | 124.7(3)  | O(1)-C(8)-C(9)    | 110.4(3) |
| C(10)-C(9)-C(8)   | 119.4(3)  | C(10)-C(9)-C(6)   | 134.4(3) |
| C(8)-C(9)-C(6)    | 106.2(3)  | C(9)-C(10)-C(11)  | 118.2(3) |
| C(12)-C(11)-C(10) | 121.1(3)  | C(11)-C(12)-C(13) | 122.9(3) |
| C(8)-C(13)-C(12)  | 113.5(3)  | C(8)-C(13)-C(14)  | 129.1(3) |
| C(12)-C(13)-C(14) | 117.2(3)  | C(13)-C(14)-P(2)  | 134.3(3) |
| C(20)-C(15)-C(16) | 120.5(3)  | C(20)-C(15)-P(1)  | 120.1(2) |
| C(16)-C(15)-P(1)  | 119.2(2)  | C(17)-C(16)-C(15) | 117.0(3) |
| C(17)-C(16)-C(21) | 116.2(3)  | C(15)-C(16)-C(21) | 126.7(3) |
| C(18)-C(17)-C(16) | 123.6(3)  | C(19)-C(18)-C(17) | 117.7(3) |
| C(19)-C(18)-C(25) | 123.0(3)  | C(17)-C(18)-C(25) | 119.2(3) |
| C(18)-C(19)-C(20) | 123.8(3)  | C(19)-C(20)-C(15) | 117.2(3) |
| C(19)-C(20)-C(29) | 117.3(3)  | C(15)-C(20)-C(29) | 125.4(3) |
| C(24)-C(21)-C(22) | 110.1(4)  | C(24)-C(21)-C(23) | 106.9(4) |
| C(22)-C(21)-C(23) | 104.2(3)  | C(24)-C(21)-C(16) | 110.0(3) |
| C(22)-C(21)-C(16) | 114.1(3)  | C(23)-C(21)-C(16) | 111.1(3) |
| C(27)-C(25)-C(28) | 108.0(3)  | C(27)-C(25)-C(26) | 109.5(4) |
| C(28)-C(25)-C(26) | 109.1(3)  | C(27)-C(25)-C(18) | 110.8(3) |
| C(28)-C(25)-C(18) | 112.1(3)  | C(26)-C(25)-C(18) | 107.4(3) |
| C(32)-C(29)-C(31) | 111.1(3)  | C(32)-C(29)-C(30) | 105.9(3) |

# Electronic Supplementary Information for Dalton Transactions

This journal is © The Royal Society of Chemistry 2005

|                   |          |                   |          |
|-------------------|----------|-------------------|----------|
| C(31)-C(29)-C(30) | 105.1(3) | C(32)-C(29)-C(20) | 109.7(3) |
| C(31)-C(29)-C(20) | 113.1(3) | C(30)-C(29)-C(20) | 111.7(3) |
| C(38)-C(33)-C(34) | 121.0(3) | C(38)-C(33)-P(2)  | 116.8(2) |
| C(34)-C(33)-P(2)  | 120.0(2) | C(35)-C(34)-C(33) | 116.8(3) |
| C(35)-C(34)-C(39) | 119.6(3) | C(33)-C(34)-C(39) | 123.6(3) |
| C(34)-C(35)-C(36) | 122.8(3) | C(37)-C(36)-C(35) | 117.1(3) |
| C(37)-C(36)-C(43) | 119.8(3) | C(35)-C(36)-C(43) | 123.0(3) |
| C(38)-C(37)-C(36) | 123.4(3) | C(37)-C(38)-C(33) | 117.2(3) |
| C(37)-C(38)-C(47) | 116.8(3) | C(33)-C(38)-C(47) | 126.0(3) |
| C(40)-C(39)-C(41) | 109.8(3) | C(40)-C(39)-C(42) | 106.4(3) |
| C(41)-C(39)-C(42) | 106.3(3) | C(40)-C(39)-C(34) | 110.3(3) |
| C(41)-C(39)-C(34) | 112.2(3) | C(42)-C(39)-C(34) | 111.7(3) |
| C(44)-C(43)-C(45) | 108.2(4) | C(44)-C(43)-C(36) | 112.0(3) |
| C(45)-C(43)-C(36) | 109.2(3) | C(44)-C(43)-C(46) | 110.3(5) |
| C(45)-C(43)-C(46) | 108.2(3) | C(36)-C(43)-C(46) | 108.9(4) |
| C(50)-C(47)-C(48) | 108.6(4) | C(50)-C(47)-C(49) | 106.0(4) |
| C(48)-C(47)-C(49) | 107.4(3) | C(50)-C(47)-C(38) | 114.5(3) |
| C(48)-C(47)-C(38) | 111.4(3) | C(49)-C(47)-C(38) | 108.6(3) |
| O(2)-C(52)-C(51)  | 112.3(5) | C(52)-O(2)-C(53)  | 116.8(5) |
| O(2)-C(53)-C(54)  | 113.1(6) | F(4)-B(1)-F(1)    | 113.2(5) |
| F(4)-B(1)-F(3)    | 108.3(3) | F(1)-B(1)-F(3)    | 108.9(3) |
| F(4)-B(1)-F(2)    | 108.3(3) | F(1)-B(1)-F(2)    | 109.2(3) |
| F(3)-B(1)-F(2)    | 108.8(4) |                   |          |

Table 9. Anisotropic displacement parameters ( $\text{Å}^2 \times 10^3$ ) for **4**

| atom  | U11     | U22    | U33    | U23    | U13    | U12    |
|-------|---------|--------|--------|--------|--------|--------|
| Au(1) | 28(1)   | 26(1)  | 35(1)  | 4(1)   | -5(1)  | -5(1)  |
| P(1)  | 29(1)   | 23(1)  | 31(1)  | 3(1)   | -4(1)  | -4(1)  |
| P(2)  | 26(1)   | 26(1)  | 33(1)  | 2(1)   | -1(1)  | -6(1)  |
| O(1)  | 28(1)   | 26(1)  | 32(1)  | 4(1)   | -4(1)  | -6(1)  |
| C(1)  | 34(2)   | 27(2)  | 31(2)  | 2(1)   | -1(1)  | -3(1)  |
| C(2)  | 24(1)   | 26(2)  | 32(2)  | 0(1)   | 0(1)   | -4(1)  |
| C(3)  | 27(2)   | 32(2)  | 43(2)  | -6(2)  | -3(1)  | -6(2)  |
| C(4)  | 27(2)   | 39(2)  | 41(2)  | -7(2)  | -8(1)  | -7(2)  |
| C(5)  | 28(2)   | 41(2)  | 32(2)  | -1(2)  | -5(1)  | -1(2)  |
| C(6)  | 25(1)   | 31(2)  | 26(1)  | 0(1)   | -1(1)  | 1(1)   |
| C(7)  | 22(1)   | 27(2)  | 31(2)  | -3(1)  | -1(1)  | -4(1)  |
| C(8)  | 27(2)   | 28(2)  | 29(2)  | 6(1)   | 1(1)   | 1(1)   |
| C(9)  | 25(2)   | 37(2)  | 27(2)  | 5(1)   | 1(1)   | 2(1)   |
| C(10) | 26(2)   | 43(2)  | 32(2)  | 9(2)   | 0(1)   | 1(2)   |
| C(11) | 32(2)   | 38(2)  | 38(2)  | 16(2)  | 1(1)   | 1(2)   |
| C(12) | 33(2)   | 31(2)  | 45(2)  | 14(2)  | 2(1)   | -1(2)  |
| C(13) | 26(2)   | 32(2)  | 31(2)  | 5(1)   | 2(1)   | -3(1)  |
| C(14) | 31(2)   | 29(2)  | 33(1)  | 3(1)   | 0(1)   | -6(2)  |
| C(15) | 27(2)   | 25(2)  | 28(1)  | 4(1)   | -3(1)  | -4(1)  |
| C(16) | 29(2)   | 31(2)  | 29(1)  | 3(1)   | -6(1)  | -4(1)  |
| C(17) | 32(2)   | 26(2)  | 37(2)  | 2(1)   | -3(1)  | 3(1)   |
| C(18) | 25(1)   | 35(2)  | 32(2)  | 8(1)   | -4(1)  | -2(1)  |
| C(19) | 27(2)   | 37(2)  | 27(1)  | 3(1)   | 0(1)   | -1(1)  |
| C(20) | 24(2)   | 34(2)  | 31(2)  | -2(1)  | -1(1)  | -8(1)  |
| C(21) | 54(2)   | 35(2)  | 30(2)  | -1(2)  | 0(2)   | 10(2)  |
| C(22) | 90(3)   | 62(3)  | 38(2)  | 11(2)  | 25(2)  | 15(3)  |
| C(23) | 101(4)  | 85(4)  | 34(2)  | 14(2)  | 21(2)  | 58(3)  |
| C(24) | 83(4)   | 90(4)  | 57(3)  | -39(3) | -18(3) | -6(3)  |
| C(25) | 39(2)   | 39(2)  | 34(2)  | 13(2)  | -2(1)  | 3(2)   |
| C(26) | 38(2)   | 86(4)  | 56(2)  | 31(2)  | -11(2) | 7(2)   |
| C(27) | 78(3)   | 38(3)  | 52(2)  | 18(2)  | -1(2)  | 11(2)  |
| C(28) | 56(2)   | 60(3)  | 40(2)  | 23(2)  | 0(2)   | 5(2)   |
| C(29) | 36(2)   | 34(2)  | 33(2)  | -2(2)  | 5(1)   | -2(2)  |
| C(30) | 62(2)   | 59(3)  | 35(2)  | 3(2)   | 10(2)  | 11(2)  |
| C(31) | 40(2)   | 56(3)  | 52(2)  | -6(2)  | 4(2)   | 18(2)  |
| C(32) | 65(3)   | 43(2)  | 47(2)  | -14(2) | 15(2)  | -9(2)  |
| C(33) | 26(1)   | 24(2)  | 28(2)  | 1(1)   | -2(1)  | -2(1)  |
| C(34) | 28(2)   | 24(2)  | 30(2)  | 1(1)   | 2(1)   | -2(1)  |
| C(35) | 41(2)   | 29(2)  | 31(2)  | -2(1)  | -4(1)  | -5(2)  |
| C(36) | 41(2)   | 30(2)  | 36(2)  | 7(2)   | -8(1)  | -12(2) |
| C(37) | 32(2)   | 39(2)  | 34(2)  | 6(2)   | 0(1)   | -10(2) |
| C(38) | 29(2)   | 32(2)  | 28(2)  | 3(1)   | -2(1)  | -2(1)  |
| C(39) | 33(2)   | 31(2)  | 29(2)  | 1(1)   | 5(1)   | -6(2)  |
| C(40) | 38(2)   | 38(2)  | 37(2)  | 5(2)   | -1(2)  | -2(2)  |
| C(41) | 38(2)   | 53(3)  | 38(2)  | 3(2)   | 12(2)  | 3(2)   |
| C(42) | 61(2)   | 50(3)  | 33(2)  | -2(2)  | 5(2)   | -16(2) |
| C(43) | 63(2)   | 38(2)  | 46(2)  | 11(2)  | -11(2) | -26(2) |
| C(44) | 252(9)  | 58(4)  | 52(3)  | 1(3)   | -16(4) | -91(5) |
| C(45) | 56(2)   | 31(2)  | 64(3)  | 5(2)   | -1(2)  | -6(2)  |
| C(46) | 52(3)   | 56(3)  | 129(4) | 45(3)  | -24(3) | -27(3) |
| C(47) | 36(2)   | 44(2)  | 28(2)  | -2(2)  | 0(1)   | -5(2)  |
| C(48) | 55(2)   | 101(4) | 34(2)  | -9(2)  | -9(2)  | 17(3)  |
| C(49) | 42(2)   | 87(4)  | 44(2)  | -16(2) | 10(2)  | 0(2)   |
| C(50) | 105(4)  | 45(3)  | 60(3)  | -16(2) | 36(3)  | -15(3) |
| C(51) | 113(5)  | 132(6) | 60(3)  | -12(3) | 23(3)  | 47(5)  |
| C(52) | 202(8)  | 104(5) | 78(4)  | -39(4) | 38(5)  | -37(6) |
| O(2)  | 115(3)  | 65(2)  | 50(2)  | -8(2)  | 14(2)  | 11(2)  |
| C(53) | 320(10) | 102(6) | 73(4)  | -26(4) | 89(6)  | -90(7) |
| C(54) | 340(10) | 108(6) | 69(4)  | -32(4) | 92(6)  | -87(7) |
| B(1)  | 78(3)   | 43(3)  | 39(2)  | -9(2)  | -17(2) | 27(3)  |
| F(1)  | 76(2)   | 64(2)  | 85(2)  | -30(2) | -37(2) | 17(2)  |
| F(2)  | 76(2)   | 49(1)  | 57(1)  | -16(1) | -31(1) | 32(1)  |
| F(3)  | 114(2)  | 73(2)  | 40(1)  | -13(1) | -5(2)  | 35(2)  |
| F(4)  | 154(3)  | 47(2)  | 57(2)  | -4(1)  | 13(2)  | 20(2)  |

The anisotropic displacement factor exponent takes the form  $2 \pi \mathbf{h}^T \mathbf{U} \mathbf{h}$

Electronic Supplementary Information for Dalton Transactions  
This journal is © The Royal Society of Chemistry 2005

[h<sup>2</sup>a<sup>2</sup>U(11) + . . . + 2hka\*b\*U(12)]

Table 10. Hydrogen Coordinates ( $\text{Å} \times 10^4$ ) and equivalent isotropic displacement parameters ( $\text{Å}^2 \times 10^3$ ) for **4**

| atom   | x          | y     | z    | U(eq) |
|--------|------------|-------|------|-------|
| H(1)   | -2289      | 6725  | 3957 | 37    |
| H(3)   | -3752      | 6676  | 3413 | 41    |
| H(4)   | -4952      | 7201  | 2822 | 43    |
| H(5)   | -4683      | 8476  | 2518 | 40    |
| H(10)  | -3854      | 10069 | 2350 | 40    |
| H(11)  | -2896.0002 | 11284 | 2416 | 44    |
| H(12)  | -1314      | 11420 | 2913 | 44    |
| H(14)  | 74         | 10958 | 3418 | 37    |
| H(17)  | 1154       | 5008  | 4517 | 38    |
| H(19)  | -52        | 6161  | 5685 | 36    |
| H(22A) | 402        | 6973  | 3425 | 95    |
| H(22B) | 1447       | 6473  | 3204 | 95    |
| H(22C) | 1592       | 6924  | 3716 | 95    |
| H(23A) | 2303       | 5484  | 3860 | 110   |
| H(23B) | 1724       | 5191  | 3361 | 110   |
| H(23C) | 1379       | 4783  | 3868 | 110   |
| H(24A) | -700       | 5096  | 3704 | 115   |
| H(24B) | -224.0000  | 5409  | 3190 | 115   |
| H(24C) | -1028      | 5965  | 3517 | 115   |
| H(26A) | 2611       | 5490  | 5590 | 90    |
| H(26B) | 2740       | 4869  | 5152 | 90    |
| H(26C) | 2785       | 4569  | 5707 | 90    |
| H(27A) | 1140       | 3978  | 4935 | 84    |
| H(27B) | 18         | 3937  | 5272 | 84    |
| H(27C) | 1218       | 3609  | 5473 | 84    |
| H(28A) | 1010       | 4432  | 6193 | 78    |
| H(28B) | -161       | 4817  | 6000 | 78    |
| H(28C) | 894        | 5373  | 6150 | 78    |
| H(30A) | -413       | 7173  | 6032 | 78    |
| H(30B) | -1635      | 6789  | 5909 | 78    |
| H(30C) | -1542      | 7712  | 6032 | 78    |
| H(31A) | -2585      | 7975  | 5367 | 74    |
| H(31B) | -2606      | 7154  | 5074 | 74    |
| H(31C) | -2103      | 7934  | 4819 | 74    |
| H(32A) | -530       | 8598  | 5502 | 78    |
| H(32B) | -100       | 8341  | 4969 | 78    |
| H(32C) | 562        | 8029  | 5445 | 78    |
| H(35)  | 2828       | 11835 | 4632 | 41    |
| H(37)  | 3504       | 11617 | 3198 | 42    |
| H(40A) | 1823       | 9472  | 5211 | 56    |
| H(40B) | 2937       | 9676  | 4892 | 56    |
| H(40C) | 1807       | 9343  | 4631 | 56    |
| H(41A) | 13         | 10194 | 4609 | 64    |
| H(41B) | 69         | 11077 | 4820 | 64    |
| H(41C) | 107        | 10338 | 5187 | 64    |
| H(42A) | 1869       | 10746 | 5572 | 72    |
| H(42B) | 1806       | 11538 | 5252 | 72    |
| H(42C) | 2955       | 11019 | 5255 | 72    |
| H(44A) | 2861       | 13206 | 4475 | 181   |
| H(44B) | 4045       | 13642 | 4349 | 181   |
| H(44C) | 4057       | 12798 | 4615 | 181   |
| H(45A) | 2219       | 13297 | 3644 | 75    |
| H(45B) | 2977       | 12958 | 3203 | 75    |
| H(45C) | 3371       | 13742 | 3484 | 75    |
| H(46A) | 5278       | 13190 | 3673 | 119   |
| H(46B) | 4942       | 12417 | 3366 | 119   |
| H(46C) | 5392       | 12333 | 3917 | 119   |
| H(48A) | 2175       | 10285 | 2260 | 95    |
| H(48B) | 2084       | 11116 | 2538 | 95    |
| H(48C) | 1158       | 10437 | 2643 | 95    |
| H(49A) | 4485       | 10115 | 3077 | 86    |
| H(49B) | 4146       | 10849 | 2737 | 86    |
| H(49C) | 4097       | 9968  | 2523 | 86    |



Electronic Supplementary Information for Dalton Transactions  
This journal is © The Royal Society of Chemistry 2005

|        |      |      |      |     |
|--------|------|------|------|-----|
| H(50A) | 1665 | 9255 | 3084 | 105 |
| H(50B) | 2913 | 9138 | 3319 | 105 |
| H(50C) | 2742 | 9065 | 2739 | 105 |
| H(51A) | -978 | 7709 | 2349 | 153 |
| H(51B) | -455 | 8406 | 2676 | 153 |
| H(51C) | 204  | 7577 | 2636 | 153 |
| H(52A) | -30  | 8732 | 1917 | 154 |
| H(52B) | 1139 | 8406 | 2149 | 154 |
| H(53A) | 1851 | 8007 | 1342 | 199 |
| H(53B) | 723  | 8433 | 1136 | 199 |
| H(54A) | 712  | 6852 | 1015 | 260 |
| H(54B) | 1723 | 7296 | 729  | 260 |
| H(54C) | 414  | 7539 | 632  | 260 |

**X-Ray structural data for 5.**

Table 11. Crystal data for **5**

|                                             |                                                                                                                     |
|---------------------------------------------|---------------------------------------------------------------------------------------------------------------------|
| Compound                                    | <b>5</b>                                                                                                            |
| Molecular formula                           | C <sub>50</sub> H <sub>66</sub> AgO <sub>2</sub> P <sub>2</sub> BF <sub>4</sub> ·1/2CH <sub>2</sub> Cl <sub>2</sub> |
| Molecular weight                            | 1040.57                                                                                                             |
| Crystal habit                               | colorless block                                                                                                     |
| Crystal dimensions(mm)                      | 0.24x0.24x0.16                                                                                                      |
| Crystal system                              | monoclinic                                                                                                          |
| Space group                                 | C2/c                                                                                                                |
| a(Å)                                        | 35.058(3)                                                                                                           |
| b(Å)                                        | 11.0840(10)                                                                                                         |
| c(Å)                                        | 30.013(3)                                                                                                           |
| α(°)                                        | 90.00                                                                                                               |
| β(°)                                        | 116.700(2)                                                                                                          |
| γ(°)                                        | 90.00                                                                                                               |
| V(Å <sup>3</sup> )                          | 10419.0(17)                                                                                                         |
| Z                                           | 8                                                                                                                   |
| d(g·cm <sup>-3</sup> )                      | 1.327                                                                                                               |
| F(000)                                      | 4336                                                                                                                |
| μ(cm <sup>-1</sup> )                        | 0.602                                                                                                               |
| Absorption corrections                      | multi-scan ; 0.8690 min, 0.9098 max                                                                                 |
| Diffractionmeter                            | KappaCCD                                                                                                            |
| X-ray source                                | MoKα                                                                                                                |
| λ(Å)                                        | 0.71069                                                                                                             |
| Monochromator                               | graphite                                                                                                            |
| T (K)                                       | 150.0(1)                                                                                                            |
| Scan mode                                   | phi and omega scans                                                                                                 |
| Maximum θ                                   | 27.48                                                                                                               |
| HKL ranges                                  | -30 44 ; -13 14 ; -38 37                                                                                            |
| Reflections measured                        | 17591                                                                                                               |
| Unique data                                 | 9900                                                                                                                |
| Rint                                        | 0.0322                                                                                                              |
| Reflections used                            | 7576                                                                                                                |
| Criterion                                   | I > 2σ(I)                                                                                                           |
| Refinement type                             | Fsqd                                                                                                                |
| Hydrogen atoms                              | mixed                                                                                                               |
| Parameters refined                          | 559                                                                                                                 |
| Reflections / parameter                     | 13                                                                                                                  |
| wR2                                         | 0.2282                                                                                                              |
| R1                                          | 0.0724                                                                                                              |
| Weights a, b                                | 0.1431 ; 17.644                                                                                                     |
| GoF                                         | 1.086                                                                                                               |
| difference peak / hole (e Å <sup>-3</sup> ) | 1.645(0.101) / -1.209(0.101)                                                                                        |

Note: The unit cell contains two disordered CH<sub>2</sub>Cl<sub>2</sub> molecules; one is located near a symmetry center, the second near a twofold axis. Since they could not be resolved with the data at hand, they were accounted for using the Platon SQUEEZE function. We were unable to determine whether the large thermal displacements observed for the BF<sub>4</sub> anion are due to disorder or must be attributed to libration.

## Electronic Supplementary Information for Dalton Transactions

This journal is © The Royal Society of Chemistry 2005

Table 12. Atomic Coordinates ( $\text{\AA} \times 10^4$ ) and equivalent isotropic displacement parameters ( $\text{\AA}^2 \times 10^3$ ) for 5

| atom  | x       | y        | z       | U(eq)  |
|-------|---------|----------|---------|--------|
| Ag(1) | 2486(1) | 1010(1)  | 6287(1) | 49(1)  |
| P(1)  | 3212(1) | 455(1)   | 6539(1) | 45(1)  |
| P(2)  | 1754(1) | 576(1)   | 5725(1) | 46(1)  |
| O(1)  | 2496(1) | -410(3)  | 5405(1) | 48(1)  |
| O(2)  | 2436(2) | 2104(4)  | 6916(1) | 74(1)  |
| C(1)  | 2852(2) | -701(4)  | 5341(2) | 52(1)  |
| C(2)  | 3279(2) | -619(4)  | 5710(2) | 52(1)  |
| C(3)  | 3586(2) | -976(5)  | 5554(2) | 66(2)  |
| C(4)  | 3462(3) | -1380(5) | 5055(2) | 77(2)  |
| C(5)  | 3050(2) | -1405(5) | 4712(2) | 69(2)  |
| C(6)  | 2741(2) | -1078(4) | 4854(2) | 60(2)  |
| C(7)  | 2277(2) | -1046(4) | 4596(2) | 61(2)  |
| C(8)  | 1965(3) | -1326(5) | 4110(2) | 79(2)  |
| C(9)  | 1553(3) | -1214(6) | 3996(2) | 77(2)  |
| C(10) | 1424(2) | -805(5)  | 4349(2) | 67(2)  |
| C(11) | 1718(2) | -497(4)  | 4840(2) | 52(1)  |
| C(12) | 2146(2) | -631(4)  | 4950(2) | 52(1)  |
| C(13) | 3444(2) | -226(4)  | 6227(2) | 53(1)  |
| C(14) | 1538(2) | -90(4)   | 5162(1) | 48(1)  |
| C(15) | 3662(2) | 729(4)   | 7147(2) | 46(1)  |
| C(16) | 3911(2) | 1793(5)  | 7216(2) | 55(1)  |
| C(17) | 4294(2) | 1854(6)  | 7633(2) | 66(1)  |
| C(18) | 4449(2) | 977(6)   | 7987(2) | 70(2)  |
| C(19) | 4190(2) | -32(5)   | 7929(2) | 58(1)  |
| C(20) | 3792(1) | -173(4)  | 7524(2) | 46(1)  |
| C(21) | 3767(2) | 2914(5)  | 6871(2) | 66(1)  |
| C(22) | 3330(2) | 3369(5)  | 6804(2) | 66(1)  |
| C(23) | 3765(3) | 2681(7)  | 6362(3) | 87(2)  |
| C(24) | 4075(3) | 4014(6)  | 7114(4) | 94(2)  |
| C(25) | 3530(2) | -1313(4) | 7519(2) | 49(1)  |
| C(26) | 3639(2) | -1715(7) | 8045(2) | 86(2)  |
| C(27) | 3049(2) | -1093(5) | 7267(2) | 58(1)  |
| C(28) | 3625(2) | -2352(6) | 7244(2) | 75(2)  |
| C(29) | 4888(2) | 1062(8)  | 8447(3) | 96(3)  |
| C(30) | 5073(3) | 2340(10) | 8484(4) | 144(4) |
| C(31) | 5185(3) | 230(10)  | 8396(5) | 185(7) |
| C(32) | 4812(3) | 990(10)  | 8900(3) | 149(5) |
| C(33) | 1285(2) | 840(4)   | 5834(2) | 47(1)  |
| C(34) | 1150(1) | -65(4)   | 6065(1) | 45(1)  |
| C(35) | 749(2)  | 51(5)    | 6040(2) | 50(1)  |
| C(36) | 477(2)  | 1036(5)  | 5809(2) | 56(1)  |
| C(37) | 636(2)  | 1937(5)  | 5635(2) | 59(1)  |
| C(38) | 1033(2) | 1905(4)  | 5639(2) | 51(1)  |
| C(39) | 1412(2) | -1194(4) | 6340(2) | 47(1)  |
| C(40) | 1328(2) | -2212(5) | 5959(2) | 71(2)  |
| C(41) | 1899(2) | -977(5)  | 6616(3) | 79(2)  |
| C(42) | 1278(2) | -1636(8) | 6732(2) | 93(2)  |
| C(43) | 32(2)   | 1070(6)  | 5793(2) | 73(2)  |
| C(44) | 87(3)   | 1110(10) | 6326(3) | 106(3) |
| C(45) | -211(2) | -114(8)  | 5551(3) | 92(2)  |
| C(46) | -237(3) | 2080(10) | 5470(5) | 145(5) |
| C(47) | 1174(2) | 3034(5)  | 5445(2) | 61(1)  |
| C(48) | 907(2)  | 4155(6)  | 5428(3) | 82(2)  |
| C(49) | 1115(2) | 2827(6)  | 4911(2) | 82(2)  |
| C(50) | 1637(2) | 3405(5)  | 5789(2) | 65(1)  |
| B(1)  | 2544(3) | 671(6)   | 8111(2) | 64(2)  |
| F(1)  | 2863(4) | 989(7)   | 8027(5) | 269(7) |
| F(2)  | 2552(2) | -518(4)  | 8181(2) | 135(2) |
| F(3)  | 2531(2) | 1382(4)  | 8470(1) | 105(1) |
| F(4)  | 2199(3) | 846(7)   | 7676(2) | 218(5) |

U(eq) is defined as 1/3 the trace of the  $U_{ij}$  tensor.

Electronic Supplementary Information for Dalton Transactions  
 This journal is © The Royal Society of Chemistry 2005

Table 13. Bond lengths (Å) and angles (deg) for 5

|                   |           |                   |          |
|-------------------|-----------|-------------------|----------|
| Ag(1)-O(2)        | 2.316(3)  | Ag(1)-P(1)        | 2.388(1) |
| Ag(1)-P(2)        | 2.403(1)  | P(1)-C(13)        | 1.672(5) |
| P(1)-C(15)        | 1.825(5)  | P(2)-C(14)        | 1.681(4) |
| P(2)-C(33)        | 1.840(5)  | O(1)-C(1)         | 1.383(6) |
| O(1)-C(12)        | 1.387(6)  | C(1)-C(6)         | 1.398(6) |
| C(1)-C(2)         | 1.410(8)  | C(2)-C(3)         | 1.409(7) |
| C(2)-C(13)        | 1.456(6)  | C(3)-C(4)         | 1.432(8) |
| C(4)-C(5)         | 1.35(1)   | C(5)-C(6)         | 1.378(8) |
| C(6)-C(7)         | 1.46(1)   | C(7)-C(8)         | 1.409(9) |
| C(7)-C(12)        | 1.411(6)  | C(8)-C(9)         | 1.33(1)  |
| C(9)-C(10)        | 1.402(9)  | C(10)-C(11)       | 1.409(7) |
| C(11)-C(12)       | 1.393(8)  | C(11)-C(14)       | 1.441(7) |
| C(15)-C(20)       | 1.423(7)  | C(15)-C(16)       | 1.425(7) |
| C(16)-C(17)       | 1.366(8)  | C(16)-C(21)       | 1.549(8) |
| C(17)-C(18)       | 1.361(9)  | C(18)-C(19)       | 1.402(8) |
| C(18)-C(29)       | 1.540(8)  | C(19)-C(20)       | 1.385(6) |
| C(20)-C(25)       | 1.560(7)  | C(21)-C(22)       | 1.537(9) |
| C(21)-C(23)       | 1.547(8)  | C(21)-C(24)       | 1.572(9) |
| C(25)-C(26)       | 1.515(8)  | C(25)-C(27)       | 1.527(7) |
| C(25)-C(28)       | 1.540(8)  | C(29)-C(31)       | 1.45(1)  |
| C(29)-C(32)       | 1.50(1)   | C(29)-C(30)       | 1.54(1)  |
| C(33)-C(34)       | 1.414(7)  | C(33)-C(38)       | 1.433(6) |
| C(34)-C(35)       | 1.381(7)  | C(34)-C(39)       | 1.552(6) |
| C(35)-C(36)       | 1.410(7)  | C(36)-C(37)       | 1.354(8) |
| C(36)-C(43)       | 1.543(9)  | C(37)-C(38)       | 1.387(8) |
| C(38)-C(47)       | 1.552(8)  | C(39)-C(42)       | 1.529(7) |
| C(39)-C(40)       | 1.538(7)  | C(39)-C(41)       | 1.545(8) |
| C(43)-C(46)       | 1.50(1)   | C(43)-C(44)       | 1.52(1)  |
| C(43)-C(45)       | 1.55(1)   | C(47)-C(50)       | 1.537(7) |
| C(47)-C(49)       | 1.538(8)  | C(47)-C(48)       | 1.544(8) |
| B(1)-F(1)         | 1.30(1)   | B(1)-F(2)         | 1.332(8) |
| B(1)-F(4)         | 1.34(1)   | B(1)-F(3)         | 1.351(7) |
| O(2)-Ag(1)-P(1)   | 109.8(1)  | O(2)-Ag(1)-P(2)   | 103.3(1) |
| P(1)-Ag(1)-P(2)   | 145.14(4) | C(13)-P(1)-C(15)  | 102.5(2) |
| C(13)-P(1)-Ag(1)  | 131.1(2)  | C(15)-P(1)-Ag(1)  | 126.4(2) |
| C(14)-P(2)-C(33)  | 102.4(2)  | C(14)-P(2)-Ag(1)  | 130.6(2) |
| C(33)-P(2)-Ag(1)  | 126.9(1)  | C(1)-O(1)-C(12)   | 106.0(3) |
| O(1)-C(1)-C(6)    | 111.9(5)  | O(1)-C(1)-C(2)    | 125.6(4) |
| C(6)-C(1)-C(2)    | 122.5(5)  | C(3)-C(2)-C(1)    | 114.9(5) |
| C(3)-C(2)-C(13)   | 116.1(5)  | C(1)-C(2)-C(13)   | 129.0(4) |
| C(2)-C(3)-C(4)    | 121.2(7)  | C(5)-C(4)-C(3)    | 121.5(6) |
| C(4)-C(5)-C(6)    | 118.7(5)  | C(5)-C(6)-C(1)    | 121.1(6) |
| C(5)-C(6)-C(7)    | 133.4(5)  | C(1)-C(6)-C(7)    | 105.5(5) |
| C(8)-C(7)-C(12)   | 119.2(7)  | C(8)-C(7)-C(6)    | 135.0(5) |
| C(12)-C(7)-C(6)   | 105.8(5)  | C(9)-C(8)-C(7)    | 119.6(5) |
| C(8)-C(9)-C(10)   | 121.0(6)  | C(9)-C(10)-C(11)  | 122.6(7) |
| C(12)-C(11)-C(10) | 115.1(5)  | C(12)-C(11)-C(14) | 128.6(4) |
| C(10)-C(11)-C(14) | 116.3(5)  | O(1)-C(12)-C(11)  | 126.6(4) |
| O(1)-C(12)-C(7)   | 110.8(5)  | C(11)-C(12)-C(7)  | 122.5(5) |
| C(2)-C(13)-P(1)   | 132.1(4)  | C(11)-C(14)-P(2)  | 132.6(4) |
| C(20)-C(15)-C(16) | 120.6(4)  | C(20)-C(15)-P(1)  | 120.2(3) |
| C(16)-C(15)-P(1)  | 118.7(4)  | C(17)-C(16)-C(15) | 117.4(5) |
| C(17)-C(16)-C(21) | 117.5(5)  | C(15)-C(16)-C(21) | 125.0(5) |
| C(18)-C(17)-C(16) | 124.3(5)  | C(17)-C(18)-C(19) | 117.6(5) |
| C(17)-C(18)-C(29) | 122.9(6)  | C(19)-C(18)-C(29) | 119.5(6) |
| C(20)-C(19)-C(18) | 122.7(5)  | C(19)-C(20)-C(15) | 117.0(5) |
| C(19)-C(20)-C(25) | 117.2(4)  | C(15)-C(20)-C(25) | 125.8(4) |
| C(22)-C(21)-C(16) | 111.2(5)  | C(22)-C(21)-C(16) | 110.8(4) |
| C(23)-C(21)-C(16) | 112.5(5)  | C(22)-C(21)-C(24) | 104.0(5) |
| C(23)-C(21)-C(24) | 106.6(6)  | C(16)-C(21)-C(24) | 111.3(6) |
| C(26)-C(25)-C(27) | 105.6(5)  | C(26)-C(25)-C(28) | 109.0(5) |
| C(27)-C(25)-C(28) | 108.2(4)  | C(26)-C(25)-C(20) | 110.9(4) |
| C(27)-C(25)-C(20) | 113.0(4)  | C(28)-C(25)-C(20) | 110.0(4) |
| C(31)-C(29)-C(32) | 119(1)    | C(31)-C(29)-C(18) | 110.1(7) |
| C(32)-C(29)-C(18) | 107.2(6)  | C(31)-C(29)-C(30) | 107(1)   |
| C(32)-C(29)-C(30) | 102.9(8)  | C(18)-C(29)-C(30) | 109.8(7) |

# Electronic Supplementary Information for Dalton Transactions

This journal is © The Royal Society of Chemistry 2005

|                   |          |                   |          |
|-------------------|----------|-------------------|----------|
| C(34)-C(33)-C(38) | 120.4(5) | C(34)-C(33)-P(2)  | 119.7(3) |
| C(38)-C(33)-P(2)  | 119.6(4) | C(35)-C(34)-C(33) | 117.6(4) |
| C(35)-C(34)-C(39) | 116.6(4) | C(33)-C(34)-C(39) | 125.8(4) |
| C(34)-C(35)-C(36) | 123.0(5) | C(37)-C(36)-C(35) | 117.2(5) |
| C(37)-C(36)-C(43) | 123.7(5) | C(35)-C(36)-C(43) | 119.0(5) |
| C(36)-C(37)-C(38) | 124.2(5) | C(37)-C(38)-C(33) | 117.1(5) |
| C(37)-C(38)-C(47) | 117.7(4) | C(33)-C(38)-C(47) | 125.2(5) |
| C(42)-C(39)-C(40) | 108.4(5) | C(42)-C(39)-C(41) | 106.5(5) |
| C(40)-C(39)-C(41) | 108.0(5) | C(42)-C(39)-C(34) | 110.8(4) |
| C(40)-C(39)-C(34) | 109.0(4) | C(41)-C(39)-C(34) | 114.0(4) |
| C(46)-C(43)-C(44) | 113.6(8) | C(46)-C(43)-C(36) | 111.8(7) |
| C(44)-C(43)-C(36) | 108.6(5) | C(46)-C(43)-C(45) | 105.9(7) |
| C(44)-C(43)-C(45) | 107.6(7) | C(36)-C(43)-C(45) | 109.1(5) |
| C(50)-C(47)-C(49) | 110.3(5) | C(50)-C(47)-C(48) | 104.4(5) |
| C(49)-C(47)-C(48) | 107.0(5) | C(50)-C(47)-C(38) | 112.4(4) |
| C(49)-C(47)-C(38) | 110.8(4) | C(48)-C(47)-C(38) | 111.7(5) |
| F(1)-B(1)-F(2)    | 110.0(8) | F(1)-B(1)-F(4)    | 104(1)   |
| F(2)-B(1)-F(4)    | 104.0(7) | F(1)-B(1)-F(3)    | 109.6(6) |
| F(2)-B(1)-F(3)    | 117.2(6) | F(4)-B(1)-F(3)    | 110.7(6) |

Electronic Supplementary Information for Dalton Transactions  
 This journal is © The Royal Society of Chemistry 2005

Table 14. Anisotropic displacement parameters ( $\text{Å}^2 \times 10^3$ ) for 5

| atom   | U11      | U22      | U33      | U23      | U13      | U12      |
|--------|----------|----------|----------|----------|----------|----------|
| Ag (1) | 51 (1)   | 52 (1)   | 40 (1)   | -8 (1)   | 17 (1)   | 4 (1)    |
| P (1)  | 51 (1)   | 46 (1)   | 44 (1)   | -4 (1)   | 26 (1)   | 0 (1)    |
| P (2)  | 54 (1)   | 47 (1)   | 32 (1)   | -5 (1)   | 14 (1)   | 0 (1)    |
| O (1)  | 84 (2)   | 34 (2)   | 38 (1)   | 1 (1)    | 36 (2)   | 0 (1)    |
| O (2)  | 120 (4)  | 56 (2)   | 62 (2)   | -10 (2)  | 54 (2)   | 5 (2)    |
| C (1)  | 97 (4)   | 30 (2)   | 47 (2)   | 6 (2)    | 49 (3)   | 10 (2)   |
| C (2)  | 87 (4)   | 36 (2)   | 52 (2)   | 10 (2)   | 47 (3)   | 13 (2)   |
| C (3)  | 106 (5)  | 48 (3)   | 67 (3)   | 19 (2)   | 61 (3)   | 26 (3)   |
| C (4)  | 140 (7)  | 54 (3)   | 77 (4)   | 17 (3)   | 84 (5)   | 31 (4)   |
| C (5)  | 134 (6)  | 44 (3)   | 51 (3)   | 12 (2)   | 62 (3)   | 24 (3)   |
| C (6)  | 123 (5)  | 29 (2)   | 45 (2)   | 5 (2)    | 51 (3)   | 7 (2)    |
| C (7)  | 124 (6)  | 30 (2)   | 49 (2)   | -4 (2)   | 56 (3)   | -11 (2)  |
| C (8)  | 169 (8)  | 38 (3)   | 48 (3)   | -4 (2)   | 63 (4)   | -17 (4)  |
| C (9)  | 123 (6)  | 71 (4)   | 40 (2)   | -15 (2)  | 38 (3)   | -38 (4)  |
| C (10) | 111 (5)  | 51 (3)   | 39 (2)   | -10 (2)  | 33 (3)   | -25 (3)  |
| C (11) | 83 (4)   | 41 (2)   | 36 (2)   | -2 (2)   | 29 (2)   | -14 (2)  |
| C (12) | 102 (4)  | 29 (2)   | 34 (2)   | -5 (2)   | 39 (2)   | -12 (2)  |
| C (13) | 75 (3)   | 43 (2)   | 49 (2)   | 5 (2)    | 35 (2)   | 13 (2)   |
| C (14) | 62 (3)   | 43 (2)   | 34 (2)   | 0 (2)    | 17 (2)   | -10 (2)  |
| C (15) | 43 (2)   | 50 (2)   | 50 (2)   | -9 (2)   | 25 (2)   | -7 (2)   |
| C (16) | 57 (3)   | 59 (3)   | 66 (3)   | -14 (2)  | 41 (2)   | -13 (2)  |
| C (17) | 62 (3)   | 72 (4)   | 69 (3)   | -14 (3)  | 34 (3)   | -27 (3)  |
| C (18) | 50 (3)   | 91 (5)   | 63 (3)   | -19 (3)  | 20 (2)   | -20 (3)  |
| C (19) | 43 (3)   | 64 (3)   | 58 (3)   | -10 (2)  | 15 (2)   | -2 (2)   |
| C (20) | 38 (2)   | 51 (2)   | 50 (2)   | -9 (2)   | 20 (2)   | 0 (2)    |
| C (21) | 82 (4)   | 58 (3)   | 75 (3)   | -2 (3)   | 50 (3)   | -11 (3)  |
| C (22) | 80 (4)   | 49 (3)   | 76 (3)   | -3 (2)   | 42 (3)   | -10 (3)  |
| C (23) | 119 (6)  | 85 (5)   | 92 (4)   | 16 (4)   | 77 (4)   | -3 (4)   |
| C (24) | 89 (5)   | 68 (4)   | 129 (7)  | -7 (4)   | 53 (5)   | -28 (4)  |
| C (25) | 43 (2)   | 48 (2)   | 48 (2)   | -1 (2)   | 13 (2)   | -1 (2)   |
| C (26) | 75 (4)   | 95 (5)   | 65 (3)   | 14 (3)   | 12 (3)   | -28 (4)  |
| C (27) | 39 (3)   | 56 (3)   | 75 (3)   | 11 (2)   | 23 (2)   | -2 (2)   |
| C (28) | 83 (4)   | 51 (3)   | 84 (4)   | -15 (3)  | 31 (3)   | 3 (3)    |
| C (29) | 55 (4)   | 113 (6)  | 88 (5)   | 1 (4)    | 5 (3)    | -36 (4)  |
| C (30) | 98 (6)   | 170 (10) | 115 (7)  | -38 (7)  | 6 (5)    | -70 (7)  |
| C (31) | 58 (5)   | 200 (10) | 210 (10) | -80 (10) | -14 (6)  | 42 (7)   |
| C (32) | 100 (7)  | 210 (10) | 75 (5)   | 15 (6)   | -13 (4)  | -62 (7)  |
| C (33) | 46 (2)   | 51 (2)   | 31 (2)   | -5 (2)   | 7 (2)    | 2 (2)    |
| C (34) | 48 (2)   | 45 (2)   | 33 (2)   | -6 (2)   | 11 (2)   | 5 (2)    |
| C (35) | 50 (3)   | 50 (3)   | 43 (2)   | -5 (2)   | 14 (2)   | -2 (2)   |
| C (36) | 44 (3)   | 59 (3)   | 49 (2)   | -10 (2)  | 7 (2)    | 3 (2)    |
| C (37) | 51 (3)   | 55 (3)   | 49 (2)   | -3 (2)   | 2 (2)    | 6 (2)    |
| C (38) | 50 (3)   | 51 (3)   | 32 (2)   | -3 (2)   | 1 (2)    | 6 (2)    |
| C (39) | 49 (3)   | 48 (2)   | 44 (2)   | 3 (2)    | 21 (2)   | 5 (2)    |
| C (40) | 97 (4)   | 49 (3)   | 64 (3)   | -3 (2)   | 34 (3)   | 3 (3)    |
| C (41) | 60 (4)   | 58 (3)   | 80 (4)   | 21 (3)   | -4 (3)   | -2 (3)   |
| C (42) | 101 (5)  | 122 (6)  | 73 (4)   | 52 (4)   | 55 (4)   | 56 (5)   |
| C (43) | 47 (3)   | 86 (4)   | 70 (3)   | -8 (3)   | 14 (2)   | 9 (3)    |
| C (44) | 68 (5)   | 148 (9)  | 103 (6)  | -46 (5)  | 40 (4)   | -2 (4)   |
| C (45) | 55 (4)   | 116 (6)  | 88 (4)   | -15 (4)  | 16 (3)   | -9 (4)   |
| C (46) | 70 (5)   | 150 (10) | 210 (10) | 73 (8)   | 54 (6)   | 57 (6)   |
| C (47) | 63 (3)   | 50 (3)   | 46 (2)   | 6 (2)    | 3 (2)    | 6 (2)    |
| C (48) | 77 (4)   | 58 (4)   | 94 (5)   | 9 (3)    | 22 (3)   | 16 (3)   |
| C (49) | 116 (5)  | 62 (4)   | 44 (3)   | 13 (2)   | 15 (3)   | -3 (3)   |
| C (50) | 61 (3)   | 52 (3)   | 65 (3)   | 5 (2)    | 12 (2)   | -1 (2)   |
| B (1)  | 93 (5)   | 51 (3)   | 53 (3)   | 1 (3)    | 39 (3)   | 1 (3)    |
| F (1)  | 370 (10) | 186 (7)  | 440 (20) | -229 (9) | 360 (10) | -198 (8) |
| F (2)  | 160 (5)  | 54 (2)   | 145 (4)  | 31 (3)   | 28 (4)   | -6 (3)   |
| F (3)  | 159 (4)  | 108 (3)  | 68 (2)   | -17 (2)  | 69 (3)   | -11 (3)  |
| F (4)  | 300 (10) | 171 (6)  | 81 (3)   | -21 (4)  | -6 (5)   | 143 (7)  |

The anisotropic displacement factor exponent takes the form  
 $2 \pi^2 [h^2 a^{*2} U(11) + \dots + 2 h k a^* b^* U(12)]$

Table 15. Hydrogen Coordinates ( $\text{Å} \times 10^4$ ) and equivalent isotropic displacement parameters ( $\text{Å}^2 \times 10^3$ ) for 5

| atom   | x    | y          | z    | U(eq) |
|--------|------|------------|------|-------|
| H(3)   | 3880 | -948       | 5784 | 79    |
| H(4)   | 3676 | -1636      | 4964 | 93    |
| H(5)   | 2973 | -1643      | 4378 | 82    |
| H(8)   | 2048 | -1593      | 3865 | 95    |
| H(9)   | 1342 | -1415      | 3669 | 93    |
| H(10)  | 1128 | -732       | 4254 | 81    |
| H(13)  | 3739 | -386       | 6423 | 63    |
| H(14)  | 1240 | -224.0000  | 5030 | 58    |
| H(17)  | 4464 | 2554       | 7677 | 79    |
| H(19)  | 4291 | -644.9999  | 8176 | 69    |
| H(22A) | 3264 | 4138       | 6624 | 99    |
| H(22B) | 3338 | 3484       | 7131 | 99    |
| H(22C) | 3110 | 2773       | 6614 | 99    |
| H(23A) | 3534 | 2117       | 6167 | 131   |
| H(23B) | 4039 | 2336       | 6416 | 131   |
| H(23C) | 3718 | 3444       | 6179 | 131   |
| H(24A) | 3934 | 4759       | 6944 | 141   |
| H(24B) | 4338 | 3898       | 7081 | 141   |
| H(24C) | 4143 | 4069       | 7468 | 141   |
| H(26A) | 3586 | -1052      | 8226 | 129   |
| H(26B) | 3941 | -1945      | 8217 | 129   |
| H(26C) | 3462 | -2410      | 8033 | 129   |
| H(27A) | 2904 | -1761      | 7343 | 87    |
| H(27B) | 2945 | -1040      | 6906 | 87    |
| H(27C) | 2986 | -336       | 7390 | 87    |
| H(28A) | 3456 | -3061      | 7238 | 113   |
| H(28B) | 3930 | -2552.9998 | 7416 | 113   |
| H(28C) | 3551 | -2103      | 6901 | 113   |
| H(30A) | 5316 | 2454       | 8813 | 216   |
| H(30B) | 4852 | 2942       | 8436 | 216   |
| H(30C) | 5169 | 2448       | 8226 | 216   |
| H(31A) | 5475 | 548        | 8575 | 278   |
| H(31B) | 5113 | 134        | 8042 | 278   |
| H(31C) | 5168 | -555       | 8536 | 278   |
| H(32A) | 4534 | 617        | 8810 | 223   |
| H(32B) | 4816 | 1804       | 9029 | 223   |
| H(32C) | 5037 | 502        | 9156 | 223   |
| H(35)  | 652  | -561       | 6187 | 60    |
| H(37)  | 464  | 2634       | 5503 | 71    |
| H(40A) | 1525 | -2883      | 6120 | 106   |
| H(40B) | 1374 | -1908      | 5680 | 106   |
| H(40C) | 1033 | -2493      | 5834 | 106   |
| H(41A) | 2035 | -1634      | 6854 | 119   |
| H(41B) | 1956 | -208       | 6796 | 119   |
| H(41C) | 2015 | -952       | 6373 | 119   |
| H(42A) | 983  | -1923.9999 | 6566 | 139   |
| H(42B) | 1300 | -970       | 6957 | 139   |
| H(42C) | 1465 | -2296      | 6924 | 139   |
| H(44A) | 226  | 1873       | 6483 | 159   |
| H(44B) | 264  | 434        | 6515 | 159   |
| H(44C) | -193 | 1065       | 6322 | 159   |
| H(45A) | -473 | -158       | 5590 | 138   |
| H(45B) | -29  | -809       | 5716 | 138   |
| H(45C) | -283 | -120       | 5195 | 138   |
| H(46A) | -183 | 2168       | 5177 | 218   |
| H(46B) | -165 | 2832       | 5661 | 218   |
| H(46C) | -540 | 1894       | 5359 | 218   |
| H(48A) | 882  | 4211       | 5740 | 123   |
| H(48B) | 621  | 4084       | 5147 | 123   |
| H(48C) | 1047 | 4882       | 5388 | 123   |
| H(49A) | 1148 | 3595       | 4770 | 123   |
| H(49B) | 829  | 2500       | 4705 | 123   |
| H(49C) | 1331 | 2253       | 4918 | 123   |
| H(50A) | 1829 | 2733       | 5820 | 98    |

Electronic Supplementary Information for Dalton Transactions  
This journal is © The Royal Society of Chemistry 2005

|         |      |      |      |    |
|---------|------|------|------|----|
| H (50B) | 1663 | 3614 | 6118 | 98 |
| H (50C) | 1713 | 4106 | 5647 | 98 |



**X-Ray structural data for 6.**

Table 16. Crystal data for **6**

|                                             |                                                                                           |
|---------------------------------------------|-------------------------------------------------------------------------------------------|
| Compound                                    | <b>6</b>                                                                                  |
| Molecular formula                           | C <sub>52</sub> H <sub>69</sub> CuNOP <sub>2</sub> ,2(CHCl <sub>3</sub> ),BF <sub>4</sub> |
| Molecular weight                            | 1175.11                                                                                   |
| Crystal habit                               | lemon yellow plate                                                                        |
| Crystal dimensions(mm)                      | 0.22x0.22x0.08                                                                            |
| Crystal system                              | triclinic                                                                                 |
| Space group                                 | Pbar1                                                                                     |
| a(Å)                                        | 11.9310(10)                                                                               |
| b(Å)                                        | 14.5270(10)                                                                               |
| c(Å)                                        | 19.1690(10)                                                                               |
| α(°)                                        | 107.9200(10)                                                                              |
| β(°)                                        | 92.0300(10)                                                                               |
| γ(°)                                        | 109.7100(10)                                                                              |
| V(Å <sup>3</sup> )                          | 2939.9(4)                                                                                 |
| Z                                           | 2                                                                                         |
| d(g·cm <sup>-3</sup> )                      | 1.327                                                                                     |
| F(000)                                      | 1224                                                                                      |
| μ(cm <sup>-1</sup> )                        | 0.748                                                                                     |
| Absorption corrections                      | multi-scan ; 0.8527 min, 0.9426 max                                                       |
| Diffractionmeter                            | KappaCCD                                                                                  |
| X-ray source                                | MoKα                                                                                      |
| λ(Å)                                        | 0.71069                                                                                   |
| Monochromator                               | graphite                                                                                  |
| T (K)                                       | 150.0(1)                                                                                  |
| Scan mode                                   | phi and omega scans                                                                       |
| Maximum θ                                   | 23.81                                                                                     |
| HKL ranges                                  | -13 13 ; -16 16 ; -21 21                                                                  |
| Reflections measured                        | 16842                                                                                     |
| Unique data                                 | 16843                                                                                     |
| Rint                                        | 0.0000                                                                                    |
| Reflections used                            | 13870                                                                                     |
| Criterion                                   | I > 2σ(I)                                                                                 |
| Refinement type                             | Fsqd                                                                                      |
| Hydrogen atoms                              | mixed                                                                                     |
| Parameters refined                          | 651                                                                                       |
| Reflections / parameter                     | 21                                                                                        |
| wR2                                         | 0.1806                                                                                    |
| R1                                          | 0.0628                                                                                    |
| Weights a, b                                | 0.0746 ; 9.0853                                                                           |
| GoF                                         | 1.069                                                                                     |
| difference peak / hole (e Å <sup>-3</sup> ) | 0.941(0.097) / -0.835(0.097)                                                              |

Note: Crystals were found to be twinned by twofold rotation about de (0 1 0) reciprocal lattice direction; BASF=0.519. Disorder of the solvate molecules apparent in their large thermal displacement parameters could not be accounted for.

Electronic Supplementary Information for Dalton Transactions  
This journal is © The Royal Society of Chemistry 2005

Table 17 Atomic Coordinates ( $\text{Å} \times 10^4$ ) and equivalent isotropic displacement parameters ( $\text{Å}^2 \times 10^3$ ) for **6**

| atom  | x        | y        | z        | U(eq)  |
|-------|----------|----------|----------|--------|
| Cu(1) | 309(1)   | 1970(1)  | 3437(1)  | 29(1)  |
| Cl(1) | -1372(2) | 1977(2)  | 148(1)   | 121(1) |
| Cl(2) | -3222(2) | 2833(1)  | 564(1)   | 113(1) |
| Cl(3) | -3856(1) | 726(1)   | -310(1)  | 73(1)  |
| Cl(4) | -5189(2) | 2672(1)  | -1094(1) | 90(1)  |
| Cl(5) | -6949(2) | 759(2)   | -1102(1) | 113(1) |
| Cl(6) | -6553(2) | 1134(2)  | -2463(1) | 109(1) |
| P(1)  | 968(1)   | 2763(1)  | 4646(1)  | 26(1)  |
| P(2)  | -141(1)  | 2528(1)  | 2542(1)  | 25(1)  |
| O(1)  | -1646(2) | 2038(2)  | 3751(1)  | 25(1)  |
| N(1)  | -66(4)   | 469(3)   | 3109(2)  | 38(1)  |
| C(1)  | -46(4)   | 2574(3)  | 5204(2)  | 30(1)  |
| C(2)  | -1353(4) | 2069(3)  | 5040(2)  | 24(1)  |
| C(3)  | -2003(4) | 1807(3)  | 5593(2)  | 31(1)  |
| C(4)  | -3255(4) | 1339(3)  | 5480(2)  | 33(1)  |
| C(5)  | -3922(4) | 1108(3)  | 4801(2)  | 31(1)  |
| C(6)  | -3323(4) | 1352(3)  | 4244(2)  | 26(1)  |
| C(7)  | -2077(4) | 1817(3)  | 4370(2)  | 23(1)  |
| C(8)  | -2664(4) | 1717(3)  | 3232(2)  | 25(1)  |
| C(9)  | -3712(4) | 1279(3)  | 3495(2)  | 25(1)  |
| C(10) | -4831(4) | 919(3)   | 3049(3)  | 34(1)  |
| C(11) | -4840(4) | 1020(3)  | 2360(3)  | 36(1)  |
| C(12) | -3785(4) | 1467(3)  | 2108(3)  | 36(1)  |
| C(13) | -2638(4) | 1813(3)  | 2528(2)  | 26(1)  |
| C(14) | -1576(4) | 2267(3)  | 2222(2)  | 27(1)  |
| C(15) | -238(5)  | -383(4)  | 2857(3)  | 50(1)  |
| C(16) | -488(6)  | -1510(4) | 2498(5)  | 93(3)  |
| C(17) | 2376(4)  | 3412(3)  | 5307(2)  | 24(1)  |
| C(18) | 2924(4)  | 4514(3)  | 5561(2)  | 25(1)  |
| C(19) | 3589(4)  | 5001(3)  | 6268(2)  | 29(1)  |
| C(20) | 3778(4)  | 4474(3)  | 6722(2)  | 32(1)  |
| C(21) | 3404(4)  | 3399(3)  | 6402(2)  | 32(1)  |
| C(22) | 2737(4)  | 2843(3)  | 5693(2)  | 29(1)  |
| C(23) | 2837(4)  | 5177(3)  | 5083(2)  | 30(1)  |
| C(24) | 1649(4)  | 5374(3)  | 5108(3)  | 36(1)  |
| C(25) | 2990(4)  | 4677(3)  | 4281(2)  | 35(1)  |
| C(26) | 3863(4)  | 6250(3)  | 5369(3)  | 48(1)  |
| C(27) | 4436(4)  | 5016(4)  | 7522(2)  | 43(1)  |
| C(28) | 5695(4)  | 4975(5)  | 7541(3)  | 69(2)  |
| C(29) | 4530(5)  | 6154(4)  | 7818(3)  | 66(2)  |
| C(30) | 3742(5)  | 4479(4)  | 8031(3)  | 50(1)  |
| C(31) | 2511(4)  | 1665(3)  | 5363(3)  | 38(1)  |
| C(32) | 3539(7)  | 1459(5)  | 5672(4)  | 84(2)  |
| C(33) | 1390(8)  | 1018(6)  | 5550(10) | 223(8) |
| C(34) | 2570(10) | 1338(6)  | 4540(3)  | 150(5) |
| C(35) | 749(4)   | 3105(3)  | 1923(2)  | 26(1)  |
| C(36) | 1311(4)  | 2520(3)  | 1415(2)  | 27(1)  |
| C(37) | 1728(4)  | 2864(3)  | 842(2)   | 32(1)  |
| C(38) | 1628(4)  | 3741(3)  | 746(2)   | 31(1)  |
| C(39) | 1179(4)  | 4333(3)  | 1279(2)  | 30(1)  |
| C(40) | 755(4)   | 4066(3)  | 1891(2)  | 26(1)  |
| C(41) | 1491(4)  | 1536(3)  | 1475(2)  | 33(1)  |
| C(42) | 2182(4)  | 1773(4)  | 2232(3)  | 38(1)  |
| C(43) | 280(4)   | 617(3)   | 1299(3)  | 44(1)  |
| C(44) | 2266(5)  | 1164(4)  | 911(3)   | 50(1)  |
| C(45) | 2080(4)  | 4072(4)  | 85(2)    | 41(1)  |
| C(46) | 1612(6)  | 3151(5)  | -628(3)  | 81(2)  |
| C(47) | 1682(8)  | 4917(7)  | -6(4)    | 106(3) |
| C(48) | 3442(5)  | 4459(5)  | 212(3)   | 70(2)  |
| C(49) | 452(4)   | 4925(3)  | 2480(2)  | 34(1)  |
| C(50) | -575(6)  | 5120(5)  | 2138(3)  | 78(2)  |
| C(51) | 1634(6)  | 5913(4)  | 2719(3)  | 69(2)  |
| C(52) | 150(6)   | 4758(4)  | 3204(3)  | 61(2)  |

Electronic Supplementary Information for Dalton Transactions

This journal is © The Royal Society of Chemistry 2005

|        |           |          |           |         |
|--------|-----------|----------|-----------|---------|
| C (53) | -2801 (5) | 1948 (4) | -126 (3)  | 55 (2)  |
| C (54) | -5873 (5) | 1343 (4) | -1571 (3) | 52 (1)  |
| B (1)  | -2357 (6) | 1504 (5) | -2135 (4) | 49 (2)  |
| F (1)  | -3423 (4) | 1497 (3) | -1926 (3) | 110 (2) |
| F (2)  | -2354 (5) | 1379 (4) | -2850 (2) | 115 (2) |
| F (3)  | -1482 (3) | 2414 (3) | -1720 (2) | 95 (1)  |
| F (4)  | -2164 (4) | 711 (3)  | -1991 (3) | 112 (2) |

-----  
U(eq) is defined as 1/3 the trace of the Uij tensor.

Table 18 Bond lengths (Å) and angles (deg) for **6**

|                   |           |                   |          |
|-------------------|-----------|-------------------|----------|
| Cu(1)-N(1)        | 1.958(4)  | Cu(1)-P(1)        | 2.221(1) |
| Cu(1)-P(2)        | 2.230(1)  | Cl(1)-C(53)       | 1.749(6) |
| Cl(2)-C(53)       | 1.758(6)  | Cl(3)-C(53)       | 1.714(5) |
| Cl(4)-C(54)       | 1.740(5)  | Cl(5)-C(54)       | 1.729(6) |
| Cl(6)-C(54)       | 1.758(6)  | P(1)-C(1)         | 1.654(5) |
| P(1)-C(17)        | 1.834(4)  | P(2)-C(14)        | 1.671(4) |
| P(2)-C(35)        | 1.827(4)  | O(1)-C(8)         | 1.389(4) |
| O(1)-C(7)         | 1.393(4)  | N(1)-C(15)        | 1.122(6) |
| C(1)-C(2)         | 1.456(6)  | C(2)-C(7)         | 1.397(5) |
| C(2)-C(3)         | 1.406(6)  | C(3)-C(4)         | 1.393(6) |
| C(4)-C(5)         | 1.385(6)  | C(5)-C(6)         | 1.376(6) |
| C(6)-C(7)         | 1.386(6)  | C(6)-C(9)         | 1.454(6) |
| C(8)-C(9)         | 1.389(6)  | C(8)-C(13)        | 1.398(6) |
| C(9)-C(10)        | 1.399(6)  | C(10)-C(11)       | 1.373(7) |
| C(11)-C(12)       | 1.387(7)  | C(12)-C(13)       | 1.408(6) |
| C(13)-C(14)       | 1.453(6)  | C(15)-C(16)       | 1.486(8) |
| C(17)-C(22)       | 1.417(6)  | C(17)-C(18)       | 1.420(5) |
| C(18)-C(19)       | 1.386(6)  | C(18)-C(23)       | 1.544(6) |
| C(19)-C(20)       | 1.382(6)  | C(20)-C(21)       | 1.391(6) |
| C(20)-C(27)       | 1.531(6)  | C(21)-C(22)       | 1.397(6) |
| C(22)-C(31)       | 1.553(6)  | C(23)-C(25)       | 1.532(6) |
| C(23)-C(24)       | 1.537(6)  | C(23)-C(26)       | 1.539(6) |
| C(27)-C(28)       | 1.523(7)  | C(27)-C(30)       | 1.528(7) |
| C(27)-C(29)       | 1.535(7)  | C(31)-C(33)       | 1.478(8) |
| C(31)-C(32)       | 1.500(7)  | C(31)-C(34)       | 1.512(9) |
| C(35)-C(40)       | 1.414(6)  | C(35)-C(36)       | 1.429(6) |
| C(36)-C(37)       | 1.381(6)  | C(36)-C(41)       | 1.553(6) |
| C(37)-C(38)       | 1.384(6)  | C(38)-C(39)       | 1.371(6) |
| C(38)-C(45)       | 1.542(6)  | C(39)-C(40)       | 1.405(6) |
| C(40)-C(49)       | 1.558(6)  | C(41)-C(42)       | 1.523(6) |
| C(41)-C(44)       | 1.537(7)  | C(41)-C(43)       | 1.540(6) |
| C(45)-C(47)       | 1.510(8)  | C(45)-C(48)       | 1.512(7) |
| C(45)-C(46)       | 1.512(7)  | C(49)-C(52)       | 1.516(6) |
| C(49)-C(50)       | 1.519(7)  | C(49)-C(51)       | 1.563(7) |
| B(1)-F(2)         | 1.325(7)  | B(1)-F(1)         | 1.345(8) |
| B(1)-F(4)         | 1.351(7)  | B(1)-F(3)         | 1.354(7) |
|                   |           |                   |          |
| N(1)-Cu(1)-P(1)   | 113.5(1)  | N(1)-Cu(1)-P(2)   | 113.7(1) |
| P(1)-Cu(1)-P(2)   | 132.60(4) | C(1)-P(1)-C(17)   | 101.6(2) |
| C(1)-P(1)-Cu(1)   | 116.5(2)  | C(17)-P(1)-Cu(1)  | 140.6(1) |
| C(14)-P(2)-C(35)  | 105.6(2)  | C(14)-P(2)-Cu(1)  | 120.6(2) |
| C(35)-P(2)-Cu(1)  | 133.1(1)  | C(8)-O(1)-C(7)    | 105.4(3) |
| C(15)-N(1)-Cu(1)  | 172.9(4)  | C(2)-C(1)-P(1)    | 130.7(3) |
| C(7)-C(2)-C(3)    | 113.8(4)  | C(7)-C(2)-C(1)    | 126.4(4) |
| C(3)-C(2)-C(1)    | 119.8(4)  | C(4)-C(3)-C(2)    | 122.9(4) |
| C(5)-C(4)-C(3)    | 120.4(4)  | C(6)-C(5)-C(4)    | 118.6(4) |
| C(5)-C(6)-C(7)    | 119.8(4)  | C(5)-C(6)-C(9)    | 133.8(4) |
| C(7)-C(6)-C(9)    | 106.3(4)  | C(6)-C(7)-O(1)    | 111.2(3) |
| C(6)-C(7)-C(2)    | 124.4(4)  | O(1)-C(7)-C(2)    | 124.4(3) |
| O(1)-C(8)-C(9)    | 111.6(3)  | O(1)-C(8)-C(13)   | 124.3(4) |
| C(9)-C(8)-C(13)   | 124.1(3)  | C(8)-C(9)-C(10)   | 119.8(4) |
| C(8)-C(9)-C(6)    | 105.5(3)  | C(10)-C(9)-C(6)   | 134.7(4) |
| C(11)-C(10)-C(9)  | 117.7(4)  | C(10)-C(11)-C(12) | 121.9(4) |
| C(11)-C(12)-C(13) | 122.4(4)  | C(8)-C(13)-C(12)  | 114.2(4) |
| C(8)-C(13)-C(14)  | 126.7(3)  | C(12)-C(13)-C(14) | 119.0(4) |
| C(13)-C(14)-P(2)  | 127.3(3)  | N(1)-C(15)-C(16)  | 178.0(6) |
| C(22)-C(17)-C(18) | 119.7(3)  | C(22)-C(17)-P(1)  | 118.9(3) |
| C(18)-C(17)-P(1)  | 119.6(3)  | C(19)-C(18)-C(17) | 117.5(4) |
| C(19)-C(18)-C(23) | 119.3(3)  | C(17)-C(18)-C(23) | 123.2(3) |
| C(20)-C(19)-C(18) | 123.7(4)  | C(19)-C(20)-C(21) | 116.5(4) |
| C(19)-C(20)-C(27) | 123.5(4)  | C(21)-C(20)-C(27) | 119.9(4) |
| C(20)-C(21)-C(22) | 123.2(4)  | C(21)-C(22)-C(17) | 117.2(4) |
| C(21)-C(22)-C(31) | 118.0(4)  | C(17)-C(22)-C(31) | 124.6(4) |
| C(25)-C(23)-C(24) | 110.8(3)  | C(25)-C(23)-C(26) | 105.4(4) |
| C(24)-C(23)-C(26) | 106.8(4)  | C(25)-C(23)-C(18) | 111.2(3) |
| C(24)-C(23)-C(18) | 111.5(4)  | C(26)-C(23)-C(18) | 110.9(3) |

Electronic Supplementary Information for Dalton Transactions

This journal is © The Royal Society of Chemistry 2005

|                   |          |                   |          |
|-------------------|----------|-------------------|----------|
| C(28)-C(27)-C(30) | 110.3(4) | C(28)-C(27)-C(20) | 108.5(4) |
| C(30)-C(27)-C(20) | 110.2(4) | C(28)-C(27)-C(29) | 109.6(4) |
| C(30)-C(27)-C(29) | 107.0(4) | C(20)-C(27)-C(29) | 111.3(4) |
| C(33)-C(31)-C(32) | 107.9(6) | C(33)-C(31)-C(34) | 113.0(8) |
| C(32)-C(31)-C(34) | 102.6(5) | C(33)-C(31)-C(22) | 112.2(5) |
| C(32)-C(31)-C(22) | 109.5(4) | C(34)-C(31)-C(22) | 111.3(4) |
| C(40)-C(35)-C(36) | 120.7(4) | C(40)-C(35)-P(2)  | 119.6(3) |
| C(36)-C(35)-P(2)  | 119.3(3) | C(37)-C(36)-C(35) | 117.6(4) |
| C(37)-C(36)-C(41) | 118.5(4) | C(35)-C(36)-C(41) | 123.9(4) |
| C(36)-C(37)-C(38) | 123.0(4) | C(39)-C(38)-C(37) | 117.9(4) |
| C(39)-C(38)-C(45) | 121.3(4) | C(37)-C(38)-C(45) | 120.8(4) |
| C(38)-C(39)-C(40) | 123.5(4) | C(39)-C(40)-C(35) | 116.6(4) |
| C(39)-C(40)-C(49) | 114.6(4) | C(35)-C(40)-C(49) | 128.6(4) |
| C(42)-C(41)-C(44) | 105.2(4) | C(42)-C(41)-C(43) | 112.2(4) |
| C(44)-C(41)-C(43) | 105.7(4) | C(42)-C(41)-C(36) | 110.7(3) |
| C(44)-C(41)-C(36) | 111.6(4) | C(43)-C(41)-C(36) | 111.2(4) |
| C(47)-C(45)-C(48) | 109.3(5) | C(47)-C(45)-C(46) | 108.0(5) |
| C(48)-C(45)-C(46) | 108.7(5) | C(47)-C(45)-C(38) | 112.6(4) |
| C(48)-C(45)-C(38) | 108.1(4) | C(46)-C(45)-C(38) | 110.1(4) |
| C(52)-C(49)-C(50) | 108.3(5) | C(52)-C(49)-C(40) | 117.8(4) |
| C(50)-C(49)-C(40) | 109.8(4) | C(52)-C(49)-C(51) | 104.0(4) |
| C(50)-C(49)-C(51) | 111.2(4) | C(40)-C(49)-C(51) | 105.6(4) |
| Cl(3)-C(53)-Cl(1) | 110.1(3) | Cl(3)-C(53)-Cl(2) | 108.5(3) |
| Cl(1)-C(53)-Cl(2) | 111.7(3) | Cl(5)-C(54)-Cl(4) | 110.9(3) |
| Cl(5)-C(54)-Cl(6) | 109.5(3) | Cl(4)-C(54)-Cl(6) | 109.5(3) |
| F(2)-B(1)-F(1)    | 112.2(6) | F(2)-B(1)-F(4)    | 110.0(6) |
| F(1)-B(1)-F(4)    | 106.4(5) | F(2)-B(1)-F(3)    | 109.9(5) |
| F(1)-B(1)-F(3)    | 108.9(5) | F(4)-B(1)-F(3)    | 109.4(5) |

Table 19. Anisotropic displacement parameters ( $\text{Å}^2 \times 10^3$ ) for **6**

| atom  | U11     | U22    | U33     | U23    | U13     | U12    |
|-------|---------|--------|---------|--------|---------|--------|
| Cu(1) | 30(1)   | 33(1)  | 22(1)   | 11(1)  | 1(1)    | 8(1)   |
| Cl(1) | 43(1)   | 213(2) | 51(1)   | 31(1)  | -7(1)   | -7(1)  |
| Cl(2) | 217(3)  | 68(1)  | 53(1)   | 8(1)   | -5(1)   | 64(1)  |
| Cl(3) | 62(1)   | 54(1)  | 87(1)   | 16(1)  | 17(1)   | 6(1)   |
| Cl(4) | 91(1)   | 48(1)  | 104(1)  | 1(1)   | -11(1)  | 17(1)  |
| Cl(5) | 125(2)  | 83(1)  | 151(2)  | 49(1)  | 82(2)   | 47(1)  |
| Cl(6) | 153(2)  | 108(2) | 68(1)   | -4(1)  | -36(1)  | 85(1)  |
| P(1)  | 25(1)   | 27(1)  | 23(1)   | 9(1)   | 0(1)    | 6(1)   |
| P(2)  | 24(1)   | 32(1)  | 21(1)   | 11(1)  | 4(1)    | 9(1)   |
| O(1)  | 19(2)   | 32(2)  | 22(2)   | 12(1)  | 5(1)    | 7(1)   |
| N(1)  | 48(3)   | 29(2)  | 32(2)   | 8(2)   | 1(2)    | 9(2)   |
| C(1)  | 34(3)   | 35(2)  | 14(2)   | 1(2)   | -1(2)   | 12(2)  |
| C(2)  | 29(3)   | 22(2)  | 22(2)   | 9(2)   | 5(2)    | 8(2)   |
| C(3)  | 40(3)   | 31(2)  | 25(2)   | 8(2)   | 8(2)    | 15(2)  |
| C(4)  | 39(3)   | 29(2)  | 35(3)   | 15(2)  | 18(2)   | 11(2)  |
| C(5)  | 27(3)   | 26(2)  | 37(3)   | 13(2)  | 7(2)    | 5(2)   |
| C(6)  | 23(2)   | 22(2)  | 33(2)   | 12(2)  | 6(2)    | 6(2)   |
| C(7)  | 30(3)   | 20(2)  | 22(2)   | 10(2)  | 10(2)   | 13(2)  |
| C(8)  | 19(2)   | 30(2)  | 22(2)   | 5(2)   | -3(2)   | 10(2)  |
| C(9)  | 17(2)   | 30(2)  | 27(2)   | 9(2)   | 2(2)    | 9(2)   |
| C(10) | 23(3)   | 34(3)  | 42(3)   | 8(2)   | 6(2)    | 9(2)   |
| C(11) | 27(3)   | 38(3)  | 40(3)   | 8(2)   | -5(2)   | 11(2)  |
| C(12) | 31(3)   | 44(3)  | 32(3)   | 15(2)  | 4(2)    | 12(2)  |
| C(13) | 21(2)   | 27(2)  | 26(2)   | 7(2)   | -1(2)   | 8(2)   |
| C(14) | 34(3)   | 31(2)  | 20(2)   | 11(2)  | 4(2)    | 13(2)  |
| C(15) | 45(3)   | 45(4)  | 53(3)   | 14(3)  | 5(3)    | 11(3)  |
| C(16) | 82(5)   | 27(3)  | 143(7)  | -5(4)  | 4(5)    | 16(3)  |
| C(17) | 22(2)   | 25(2)  | 23(2)   | 6(2)   | 1(2)    | 7(2)   |
| C(18) | 23(2)   | 30(2)  | 24(2)   | 9(2)   | 5(2)    | 11(2)  |
| C(19) | 25(2)   | 27(2)  | 27(2)   | 6(2)   | 1(2)    | 3(2)   |
| C(20) | 18(2)   | 44(3)  | 28(2)   | 11(2)  | 5(2)    | 6(2)   |
| C(21) | 28(3)   | 41(3)  | 29(2)   | 18(2)  | -1(2)   | 12(2)  |
| C(22) | 32(3)   | 32(2)  | 27(2)   | 12(2)  | 10(2)   | 14(2)  |
| C(23) | 30(3)   | 29(2)  | 33(2)   | 14(2)  | 2(2)    | 11(2)  |
| C(24) | 42(3)   | 32(2)  | 42(3)   | 17(2)  | 10(2)   | 21(2)  |
| C(25) | 43(3)   | 40(3)  | 35(3)   | 23(2)  | 14(2)   | 21(2)  |
| C(26) | 48(3)   | 29(3)  | 60(3)   | 22(2)  | -3(3)   | 1(2)   |
| C(27) | 28(3)   | 59(3)  | 28(3)   | 10(2)  | 3(2)    | 4(2)   |
| C(28) | 34(4)   | 127(6) | 30(3)   | 17(4)  | -5(3)   | 19(4)  |
| C(29) | 67(4)   | 66(4)  | 30(3)   | 2(3)   | -6(3)   | -4(3)  |
| C(30) | 47(3)   | 73(4)  | 27(3)   | 17(2)  | 2(2)    | 18(3)  |
| C(31) | 39(3)   | 24(2)  | 53(3)   | 14(2)  | 0(2)    | 13(2)  |
| C(32) | 119(6)  | 73(4)  | 67(4)   | -8(3)  | -17(4)  | 75(4)  |
| C(33) | 119(7)  | 58(5)  | 550(30) | 144(9) | 200(10) | 58(5)  |
| C(34) | 340(10) | 89(5)  | 40(4)   | -23(3) | -52(6)  | 154(8) |
| C(35) | 24(2)   | 31(2)  | 18(2)   | 8(2)   | 1(2)    | 4(2)   |
| C(36) | 23(2)   | 32(2)  | 24(2)   | 7(2)   | 2(2)    | 8(2)   |
| C(37) | 27(3)   | 39(3)  | 25(2)   | 8(2)   | 7(2)    | 10(2)  |
| C(38) | 21(2)   | 46(3)  | 22(2)   | 16(2)  | 2(2)    | 3(2)   |
| C(39) | 27(3)   | 37(2)  | 27(2)   | 16(2)  | 3(2)    | 6(2)   |
| C(40) | 21(2)   | 34(2)  | 19(2)   | 7(2)   | -1(2)   | 7(2)   |
| C(41) | 37(3)   | 29(2)  | 34(3)   | 8(2)   | 14(2)   | 13(2)  |
| C(42) | 31(3)   | 43(3)  | 48(3)   | 22(2)  | 10(2)   | 18(2)  |
| C(43) | 52(3)   | 27(3)  | 39(3)   | 3(2)   | 5(2)    | 4(2)   |
| C(44) | 57(4)   | 49(3)  | 53(3)   | 19(3)  | 20(3)   | 28(3)  |
| C(45) | 31(3)   | 71(3)  | 30(3)   | 32(2)  | 10(2)   | 15(2)  |
| C(46) | 72(4)   | 113(5) | 23(3)   | 23(3)  | 5(3)    | -7(4)  |
| C(47) | 149(8)  | 166(8) | 95(6)   | 110(6) | 76(5)   | 106(7) |
| C(48) | 52(4)   | 101(5) | 39(3)   | 35(3)  | 7(3)    | -3(3)  |
| C(49) | 47(3)   | 34(3)  | 25(2)   | 11(2)  | 4(2)    | 21(2)  |
| C(50) | 91(5)   | 109(5) | 51(4)   | 7(3)   | 4(3)    | 76(4)  |
| C(51) | 78(4)   | 38(3)  | 72(4)   | 5(3)   | 15(3)   | 11(3)  |
| C(52) | 115(5)  | 51(3)  | 31(3)   | 11(2)  | 21(3)   | 49(3)  |
| C(53) | 67(4)   | 52(3)  | 28(3)   | 17(2)  | -4(3)   | -1(3)  |

Electronic Supplementary Information for Dalton Transactions

This journal is © The Royal Society of Chemistry 2005

|        |         |         |         |        |         |        |
|--------|---------|---------|---------|--------|---------|--------|
| C (54) | 43 (3)  | 49 (3)  | 63 (4)  | 17 (3) | 1 (3)   | 19 (3) |
| B (1)  | 41 (4)  | 49 (4)  | 56 (4)  | 21 (3) | 9 (3)   | 11 (3) |
| F (1)  | 68 (3)  | 114 (3) | 136 (4) | 36 (3) | 34 (3)  | 21 (2) |
| F (2)  | 159 (4) | 139 (4) | 42 (2)  | 36 (2) | 19 (2)  | 44 (3) |
| F (3)  | 74 (3)  | 75 (3)  | 103 (3) | 16 (2) | -16 (2) | 2 (2)  |
| F (4)  | 110 (3) | 94 (3)  | 165 (4) | 84 (3) | 21 (3)  | 40 (3) |

-----  
The anisotropic displacement factor exponent takes the form  
 $2 \pi^2 [h^2 a^2 U(11) + \dots + 2 h k a^* b^* U(12)]$

Table 20. Hydrogen Coordinates ( $\text{Å} \times 10^4$ ) and equivalent isotropic displacement parameters ( $\text{Å}^2 \times 10^3$ ) for **6**

| atom   | x          | y     | z     | U(eq) |
|--------|------------|-------|-------|-------|
| H(1)   | 277        | 2839  | 5717  | 36    |
| H(3)   | -1570      | 1956  | 6065  | 38    |
| H(4)   | -3653      | 1176  | 5871  | 40    |
| H(5)   | -4776      | 789   | 4722  | 37    |
| H(10)  | -5559      | 615   | 3218  | 41    |
| H(11)  | -5589      | 776   | 2048  | 44    |
| H(12)  | -3838      | 1541  | 1634  | 43    |
| H(14)  | -1712.0001 | 2433  | 1793  | 33    |
| H(16A) | -1356      | -1901 | 2429  | 140   |
| H(16B) | -61        | -1743 | 2814  | 140   |
| H(16C) | -211       | -1631 | 2014  | 140   |
| H(19)  | 3934       | 5739  | 6450  | 34    |
| H(21)  | 3612       | 3025  | 6681  | 38    |
| H(24A) | 1567       | 5690  | 5626  | 53    |
| H(24B) | 971        | 4713  | 4880  | 53    |
| H(24C) | 1650       | 5845  | 4836  | 53    |
| H(25A) | 3019       | 5150  | 4005  | 52    |
| H(25B) | 2307       | 4022  | 4046  | 52    |
| H(25C) | 3740       | 4541  | 4278  | 52    |
| H(26A) | 3739       | 6659  | 5851  | 72    |
| H(26B) | 3868       | 6614  | 5015  | 72    |
| H(26C) | 4636       | 6161  | 5423  | 72    |
| H(28A) | 5633       | 4249  | 7383  | 104   |
| H(28B) | 6138       | 5342  | 8047  | 104   |
| H(28C) | 6124       | 5309  | 7204  | 104   |
| H(29A) | 4962       | 6483  | 8328  | 98    |
| H(29B) | 3719       | 6179  | 7810  | 98    |
| H(29C) | 4969       | 6524  | 7503  | 98    |
| H(30A) | 3652       | 3746  | 7855  | 76    |
| H(30B) | 2944       | 4531  | 8026  | 76    |
| H(30C) | 4186       | 4817  | 8538  | 76    |
| H(32A) | 3509       | 1542  | 6197  | 126   |
| H(32B) | 4304       | 1952  | 5623  | 126   |
| H(32C) | 3476       | 748   | 5398  | 126   |
| H(33A) | 1342       | 1326  | 6071  | 334   |
| H(33B) | 1391       | 315   | 5450  | 334   |
| H(33C) | 694        | 982   | 5238  | 334   |
| H(34A) | 2706       | 681   | 4382  | 225   |
| H(34B) | 3233       | 1875  | 4439  | 225   |
| H(34C) | 1808       | 1246  | 4267  | 225   |
| H(37)  | 2100       | 2481  | 499   | 38    |
| H(39)  | 1154       | 4958  | 1232  | 36    |
| H(42A) | 2998       | 2278  | 2287  | 57    |
| H(42B) | 2230       | 1131  | 2274  | 57    |
| H(42C) | 1763       | 2062  | 2622  | 57    |
| H(43A) | 425        | -5    | 1307  | 66    |
| H(43B) | -128       | 485   | 806   | 66    |
| H(43C) | -228       | 785   | 1672  | 66    |
| H(44A) | 3050       | 1724  | 992   | 76    |
| H(44B) | 1857       | 974   | 406   | 76    |
| H(44C) | 2383       | 557   | 974   | 76    |
| H(46A) | 1907       | 2610  | -595  | 121   |
| H(46B) | 1898       | 3371  | -1045 | 121   |
| H(46C) | 729        | 2874  | -706  | 121   |
| H(47A) | 800        | 4675  | -75   | 159   |
| H(47B) | 1972       | 5085  | -440  | 159   |
| H(47C) | 2017       | 5538  | 439   | 159   |
| H(48A) | 3757       | 5074  | 662   | 104   |
| H(48B) | 3747       | 4641  | -215  | 104   |
| H(48C) | 3703       | 3912  | 270   | 104   |
| H(50A) | -1323      | 4516  | 2042  | 117   |
| H(50B) | -394       | 5235  | 1670  | 117   |
| H(50C) | -673       | 5737  | 2481  | 117   |



Electronic Supplementary Information for Dalton Transactions  
This journal is © The Royal Society of Chemistry 2005

|         |            |      |       |     |
|---------|------------|------|-------|-----|
| H (51A) | 1502       | 6483 | 3097  | 103 |
| H (51B) | 1852       | 6118 | 2286  | 103 |
| H (51C) | 2286       | 5759 | 2922  | 103 |
| H (52A) | 197        | 5417 | 3571  | 92  |
| H (52B) | 726        | 4507 | 3388  | 92  |
| H (52C) | -666.9999  | 4243 | 3122  | 92  |
| H (53)  | -2790.0002 | 2133 | -587  | 66  |
| H (54)  | -5244      | 1023 | -1619 | 62  |

**Data for the theoretical structure I.**

Functional: B3PW91

Basis set: 6-31G\* for C, H, O, P and LANL2DZ for Au.

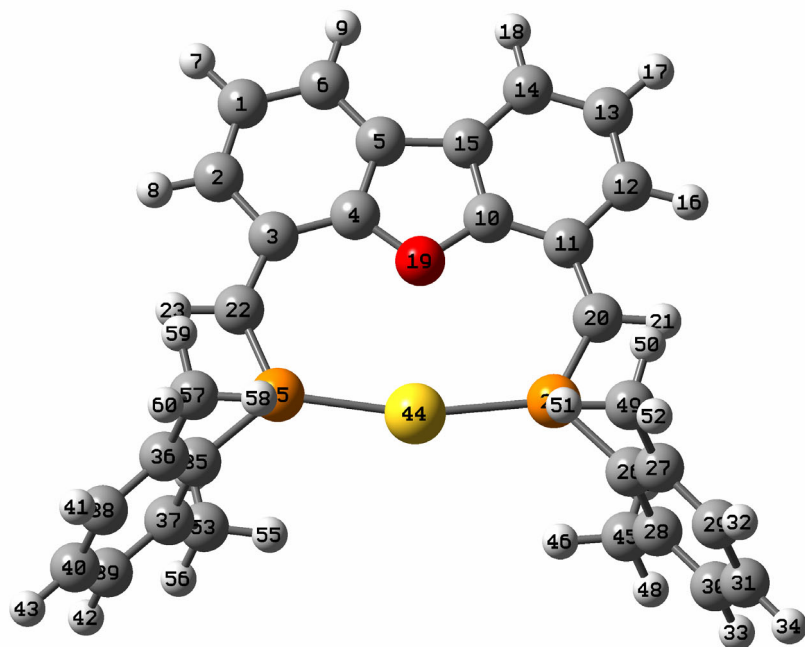

Electronic Supplementary Information for Dalton Transactions  
This journal is © The Royal Society of Chemistry 2005

Standard orientation:

| Center<br>Number | Atomic<br>Number | Atomic<br>Type | Coordinates (Angstroms) |           |           |
|------------------|------------------|----------------|-------------------------|-----------|-----------|
|                  |                  |                | X                       | Y         | Z         |
| 1                | 6                | 0              | -3.033262               | 4.861950  | -0.020594 |
| 2                | 6                | 0              | -3.393017               | 3.517490  | -0.015349 |
| 3                | 6                | 0              | -2.449256               | 2.460775  | -0.010123 |
| 4                | 6                | 0              | -1.105626               | 2.884629  | -0.011012 |
| 5                | 6                | 0              | -0.723818               | 4.234086  | -0.016575 |
| 6                | 6                | 0              | -1.692252               | 5.238876  | -0.021296 |
| 7                | 1                | 0              | -3.809429               | 5.620698  | -0.024337 |
| 8                | 1                | 0              | -4.447751               | 3.255986  | -0.015225 |
| 9                | 1                | 0              | -1.409646               | 6.287332  | -0.025628 |
| 10               | 6                | 0              | 1.105627                | 2.884628  | -0.011015 |
| 11               | 6                | 0              | 2.449257                | 2.460773  | -0.010129 |
| 12               | 6                | 0              | 3.393019                | 3.517487  | -0.015361 |
| 13               | 6                | 0              | 3.033265                | 4.861947  | -0.020608 |
| 14               | 6                | 0              | 1.692255                | 5.238874  | -0.021307 |
| 15               | 6                | 0              | 0.723821                | 4.234085  | -0.016617 |
| 16               | 1                | 0              | 4.447753                | 3.255982  | -0.015239 |
| 17               | 1                | 0              | 3.809431                | 5.620694  | -0.024355 |
| 18               | 1                | 0              | 1.409648                | 6.287330  | -0.025640 |
| 19               | 8                | 0              | 0.000000                | 2.074320  | -0.007441 |
| 20               | 6                | 0              | 2.977225                | 1.116251  | -0.005680 |
| 21               | 1                | 0              | 4.067499                | 1.081600  | -0.009044 |
| 22               | 6                | 0              | -2.977225               | 1.116254  | -0.005675 |
| 23               | 1                | 0              | -4.067499               | 1.081603  | -0.009036 |
| 24               | 15               | 0              | 2.293993                | -0.420923 | 0.004594  |
| 25               | 15               | 0              | -2.293994               | -0.420921 | 0.004593  |
| 26               | 6                | 0              | 3.605080                | -1.671241 | 0.005906  |
| 27               | 6                | 0              | 4.108927                | -2.137085 | 1.240799  |
| 28               | 6                | 0              | 4.052912                | -2.194594 | -1.227562 |
| 29               | 6                | 0              | 5.096284                | -3.125044 | 1.213519  |
| 30               | 6                | 0              | 5.041591                | -3.181051 | -1.199521 |
| 31               | 6                | 0              | 5.560226                | -3.640453 | 0.007203  |
| 32               | 1                | 0              | 5.500835                | -3.494512 | 2.152184  |
| 33               | 1                | 0              | 5.404019                | -3.593571 | -2.137460 |
| 34               | 1                | 0              | 6.326793                | -4.410509 | 0.007724  |
| 35               | 6                | 0              | -3.605082               | -1.671237 | 0.005906  |
| 36               | 6                | 0              | -4.108918               | -2.137092 | 1.240799  |
| 37               | 6                | 0              | -4.052923               | -2.194584 | -1.227562 |
| 38               | 6                | 0              | -5.096272               | -3.125053 | 1.213521  |
| 39               | 6                | 0              | -5.041598               | -3.181044 | -1.199520 |
| 40               | 6                | 0              | -5.560223               | -3.640456 | 0.007206  |
| 41               | 1                | 0              | -5.500814               | -3.494529 | 2.152187  |
| 42               | 1                | 0              | -5.404030               | -3.593561 | -2.137458 |
| 43               | 1                | 0              | -6.326787               | -4.410516 | 0.007728  |
| 44               | 79               | 0              | 0.000000                | -0.706119 | 0.006345  |
| 45               | 6                | 0              | 3.505886                | -1.716027 | -2.547510 |
| 46               | 1                | 0              | 2.412964                | -1.808918 | -2.595037 |
| 47               | 1                | 0              | 3.748481                | -0.662437 | -2.731751 |
| 48               | 1                | 0              | 3.921059                | -2.299384 | -3.374013 |
| 49               | 6                | 0              | 3.622098                | -1.598340 | 2.561194  |
| 50               | 1                | 0              | 3.890044                | -0.543291 | 2.695340  |
| 51               | 1                | 0              | 2.530537                | -1.668510 | 2.654341  |
| 52               | 1                | 0              | 4.059352                | -2.157525 | 3.392988  |
| 53               | 6                | 0              | -3.505906               | -1.716011 | -2.547511 |
| 54               | 1                | 0              | -3.748503               | -0.662420 | -2.731746 |
| 55               | 1                | 0              | -2.412984               | -1.808900 | -2.595044 |
| 56               | 1                | 0              | -3.921084               | -2.299365 | -3.374015 |

Electronic Supplementary Information for Dalton Transactions

This journal is © The Royal Society of Chemistry 2005

|    |   |   |           |           |          |
|----|---|---|-----------|-----------|----------|
| 57 | 6 | 0 | -3.622079 | -1.598356 | 2.561194 |
| 58 | 1 | 0 | -2.530518 | -1.668526 | 2.654333 |
| 59 | 1 | 0 | -3.890024 | -0.543307 | 2.695350 |
| 60 | 1 | 0 | -4.059328 | -2.157545 | 3.392989 |

---

**Data for the theoretical structure II.**

Functional: B3PW91 MM: UFF

Basis set: 6-31G\* for C, H, O, P and LANL2DZ for Cu. The methyl groups of the xylyl substituents were optimized at the UFF level of theory.

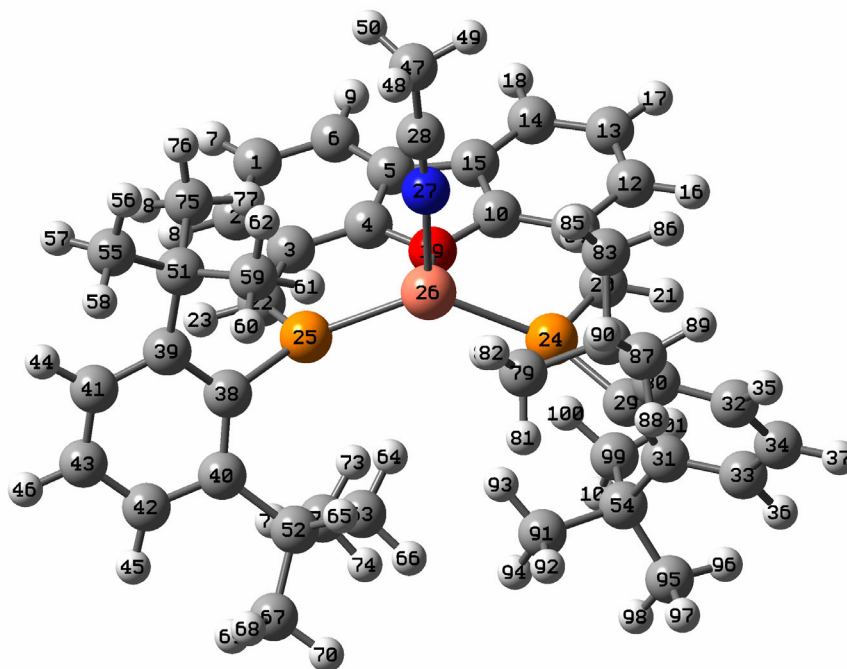

Electronic Supplementary Information for Dalton Transactions  
This journal is © The Royal Society of Chemistry 2005

Standard orientation:

| Center<br>Number | Atomic<br>Number | Atomic<br>Type | Coordinates (Angstroms) |           |           |
|------------------|------------------|----------------|-------------------------|-----------|-----------|
|                  |                  |                | X                       | Y         | Z         |
| 1                | 6                | 10061000       | -2.973133               | 4.909256  | -1.553524 |
| 2                | 6                | 10061000       | -3.280751               | 3.549843  | -1.507678 |
| 3                | 6                | 10061000       | -2.348908               | 2.562670  | -1.117668 |
| 4                | 6                | 10061000       | -1.071419               | 3.059329  | -.808518  |
| 5                | 6                | 10061000       | -.738529                | 4.418601  | -.853055  |
| 6                | 6                | 10061000       | -1.699620               | 5.362832  | -1.223160 |
| 7                | 1                | 10011000       | -3.738521               | 5.617515  | -1.855614 |
| 8                | 1                | 10011000       | -4.284121               | 3.225431  | -1.770450 |
| 9                | 1                | 10011000       | -1.456393               | 6.420304  | -1.264433 |
| 10               | 6                | 10061000       | 1.079408                | 3.176459  | -.291275  |
| 11               | 6                | 10061000       | 2.409639                | 2.814931  | -.018722  |
| 12               | 6                | 10061000       | 3.303911                | 3.903957  | .077747   |
| 13               | 6                | 10061000       | 2.904281                | 5.229661  | -.087305  |
| 14               | 6                | 10061000       | 1.582454                | 5.543368  | -.391586  |
| 15               | 6                | 10061000       | .664330                 | 4.496161  | -.503717  |
| 16               | 1                | 10011000       | 4.349238                | 3.686830  | .280862   |
| 17               | 1                | 10011000       | 3.641099                | 6.022061  | .001850   |
| 18               | 1                | 10011000       | 1.276881                | 6.573322  | -.549616  |
| 19               | 8                | 10081000       | .026844                 | 2.300431  | -.457356  |
| 20               | 6                | 10061000       | 2.937544                | 1.471789  | .089073   |
| 21               | 1                | 10011000       | 4.025860                | 1.413015  | .067559   |
| 22               | 6                | 10061000       | -2.799188               | 1.187664  | -1.051107 |
| 23               | 1                | 10011000       | -3.788193               | 1.019356  | -1.477424 |
| 24               | 15               | 10151004       | 2.106205                | .005784   | .143353   |
| 25               | 15               | 10151004       | -2.061019               | -.150185  | -.344770  |
| 26               | 29               | 10291003       | -.102112                | .157591   | .796606   |
| 27               | 7                | 10071001       | -.415371                | .689745   | 2.756109  |
| 28               | 6                | 10061001       | -.656936                | .912672   | 3.866256  |
| 29               | 6                | 10061000       | 3.462670                | -1.240032 | .126055   |
| 30               | 6                | 10061000       | 3.841769                | -1.854647 | 1.369765  |
| 31               | 6                | 10061000       | 4.271421                | -1.329260 | -1.065789 |
| 32               | 6                | 10061000       | 5.196100                | -2.221465 | 1.464776  |
| 33               | 6                | 10061000       | 5.608016                | -1.703800 | -.847566  |
| 34               | 6                | 10061000       | 6.071160                | -2.076270 | .403242   |
| 35               | 1                | 10011000       | 5.629455                | -2.619532 | 2.375671  |
| 36               | 1                | 10011000       | 6.344125                | -1.726611 | -1.644234 |
| 37               | 1                | 10011000       | 7.119847                | -2.327819 | .534007   |
| 38               | 6                | 10061000       | -3.322235               | -1.477175 | -.561320  |
| 39               | 6                | 10061000       | -4.474082               | -1.461951 | .302773   |
| 40               | 6                | 10061000       | -3.235971               | -2.299767 | -1.736513 |
| 41               | 6                | 10061000       | -5.639840               | -2.018090 | -.251238  |
| 42               | 6                | 10061000       | -4.462821               | -2.814527 | -2.193167 |
| 43               | 6                | 10061000       | -5.643472               | -2.617617 | -1.499386 |
| 44               | 1                | 10011000       | -6.595518               | -2.006950 | .262427   |
| 45               | 1                | 10011000       | -4.551427               | -3.384265 | -3.111947 |
| 46               | 1                | 10011000       | -6.574827               | -3.000480 | -1.906986 |
| 47               | 6                | 10061003       | -.962700                | 1.186637  | 5.258996  |
| 48               | 1                | 10011000       | -1.297388               | .268403   | 5.751909  |
| 49               | 1                | 10011000       | -.071888                | 1.562277  | 5.771842  |
| 50               | 1                | 10011000       | -1.756998               | 1.936521  | 5.326379  |
| 51               | 6                | 10061003       | -4.456177               | -.967563  | 1.808097  |
| 52               | 6                | 10061003       | -1.883057               | -2.691777 | -2.457857 |
| 53               | 6                | 10061003       | 2.861419                | -2.144692 | 2.576597  |
| 54               | 6                | 10061003       | 3.724616                | -1.151876 | -2.544633 |
| 55               | 6                | 10061003       | -5.714989               | -1.422684 | 2.572691  |
| 56               | 1                | 10011000       | -5.635467               | -1.185118 | 3.656545  |

## Electronic Supplementary Information for Dalton Transactions

This journal is © The Royal Society of Chemistry 2005

|     |   |          |           |           |           |
|-----|---|----------|-----------|-----------|-----------|
| 57  | 1 | 10011000 | -6.622643 | -.899869  | 2.200686  |
| 58  | 1 | 10011000 | -5.858736 | -2.521850 | 2.485626  |
| 59  | 6 | 10061003 | -3.259583 | -1.588946 | 2.545239  |
| 60  | 1 | 10011000 | -3.307130 | -2.698330 | 2.491952  |
| 61  | 1 | 10011000 | -2.289089 | -1.275023 | 2.121260  |
| 62  | 1 | 10011000 | -3.252543 | -1.290665 | 3.616588  |
| 63  | 6 | 10061003 | -.829166  | -3.109475 | -1.418153 |
| 64  | 1 | 10011000 | -.456146  | -2.259904 | -.817970  |
| 65  | 1 | 10011000 | -1.252706 | -3.865552 | -.722118  |
| 66  | 1 | 10011000 | .062737   | -3.557285 | -1.906075 |
| 67  | 6 | 10061003 | -2.070949 | -3.906273 | -3.389307 |
| 68  | 1 | 10011000 | -2.537371 | -4.755789 | -2.844214 |
| 69  | 1 | 10011000 | -2.692136 | -3.647482 | -4.273598 |
| 70  | 1 | 10011000 | -1.096852 | -4.262140 | -3.791580 |
| 71  | 6 | 10061003 | -1.342857 | -1.544598 | -3.323464 |
| 72  | 1 | 10011000 | -2.150825 | -1.138127 | -3.968983 |
| 73  | 1 | 10011000 | -.925616  | -.715539  | -2.723033 |
| 74  | 1 | 10011000 | -.518473  | -1.896214 | -3.981032 |
| 75  | 6 | 10061003 | -4.396581 | .563784   | 1.919109  |
| 76  | 1 | 10011000 | -4.667094 | .904300   | 2.942630  |
| 77  | 1 | 10011000 | -3.382593 | .963881   | 1.733660  |
| 78  | 1 | 10011000 | -5.104449 | 1.030369  | 1.200833  |
| 79  | 6 | 10061003 | 1.495292  | -2.646375 | 2.074696  |
| 80  | 1 | 10011000 | .886158   | -1.851396 | 1.615711  |
| 81  | 1 | 10011000 | 1.631371  | -3.460647 | 1.330410  |
| 82  | 1 | 10011000 | .875360   | -3.040803 | 2.909147  |
| 83  | 6 | 10061003 | 2.674655  | -.894347  | 3.442716  |
| 84  | 1 | 10011000 | 2.218141  | -.061682  | 2.878175  |
| 85  | 1 | 10011000 | 2.015766  | -1.109809 | 4.312214  |
| 86  | 1 | 10011000 | 3.656326  | -.541098  | 3.825788  |
| 87  | 6 | 10061003 | 3.409384  | -3.257641 | 3.493854  |
| 88  | 1 | 10011000 | 3.680310  | -4.158606 | 2.901358  |
| 89  | 1 | 10011000 | 4.294045  | -2.917930 | 4.073133  |
| 90  | 1 | 10011000 | 2.657078  | -3.564652 | 4.253289  |
| 91  | 6 | 10061003 | 2.381886  | -1.879430 | -2.699230 |
| 92  | 1 | 10011000 | 2.477255  | -2.937883 | -2.373708 |
| 93  | 1 | 10011000 | 1.576757  | -1.405741 | -2.109606 |
| 94  | 1 | 10011000 | 2.039517  | -1.869957 | -3.756892 |
| 95  | 6 | 10061003 | 4.678416  | -1.785472 | -3.577436 |
| 96  | 1 | 10011000 | 5.621801  | -1.204941 | -3.666870 |
| 97  | 1 | 10011000 | 4.914776  | -2.837728 | -3.306744 |
| 98  | 1 | 10011000 | 4.225235  | -1.796775 | -4.593213 |
| 99  | 6 | 10061003 | 3.554125  | .322353   | -2.933320 |
| 100 | 1 | 10011000 | 2.651167  | .772491   | -2.479528 |
| 101 | 1 | 10011000 | 4.445333  | .909092   | -2.623370 |
| 102 | 1 | 10011000 | 3.428604  | .435919   | -4.032426 |

---
